1 **Title:** Comprehensive characterization of internal and cuticle surface microbiota of laboratory-  
2 reared F<sub>1</sub> *Anopheles albimanus* originating from different sites

3 **Authors:**

4 Nsa Dada<sup>a,d,#</sup>, Ana Cristina Benedict<sup>b</sup>, Francisco López<sup>b</sup>, Juan C. Lol<sup>b</sup>, Mili Sheth<sup>c</sup>, Nicole  
5 Dzuris<sup>a</sup>, Norma Padilla<sup>b</sup> and Audrey Lenhart<sup>a</sup>

6 **Author affiliations**

7 <sup>a</sup> Entomology Branch, Division of Parasitic Diseases and Malaria, Center for Global Health,  
8 United States Centers for Diseases Control and Prevention, Atlanta, GA, United States of  
9 America

10 <sup>b</sup> Grupo de Biología y Control de Vectores, Centro de Estudios en Salud, Universidad del Valle  
11 de Guatemala, Guatemala

12 <sup>c</sup> Biotechnology Core Facility Branch, Division of Scientific Resources, National Center for  
13 Emerging & Zoonotic Infectious Diseases, United States Centers for Disease Control and  
14 Prevention, Atlanta, GA, United States of America

15 <sup>d</sup> American Society for Microbiology, Washington, DC, United States of America

16 **Author ORCID IDs:**

17 Nsa Dada: 0000-0002-5276-2328

18 Juan C. Lol; 0000-0002-7799-9495

19 Norma Padilla: 0000-0003-4558-4444

20 Audrey Lenhart: 0000-0002-9156-4228

21 **#Address correspondence** to Nsa Dada: [nsadada@yahoo.com](mailto:nsadada@yahoo.com)

## 22 **Abstract**

23 **Background:** Research on mosquito-microbe interactions may lead to new tools for mosquito  
24 and mosquito-borne disease control. To date, such research has largely utilized laboratory-  
25 reared mosquitoes that typically lack the microbial diversity of wild populations. A logical  
26 progression in this area involves working under controlled settings using field-collected  
27 mosquitoes or, in most cases, their progeny. Thus, an understanding of how laboratory  
28 colonization affects the assemblage of mosquito microbiota would aid in advancing mosquito  
29 microbiome studies and their applications beyond laboratory settings.

30 **Methods:** Using high throughput 16S rRNA amplicon sequencing, we characterized the internal  
31 and cuticle surface microbiota of F<sub>1</sub> progeny of wild-caught adult *Anopheles albimanus* from four  
32 locations in Guatemala. A total of 132 late instar larvae and 135 2-5day old, non-blood-fed virgin  
33 adult females that were reared under identical laboratory conditions, were pooled (3  
34 individuals/pool) and analyzed.

35 **Results:** Results showed geographical heterogeneity in both F<sub>1</sub> larval internal ( $p=0.001$ ; pseudo-  
36  $F = 9.53$ ) and cuticle surface ( $p=0.001$ ; pseudo- $F = 8.51$ ) microbiota, and only F<sub>1</sub> adult cuticle  
37 surface ( $p=0.001$ ; pseudo- $F = 4.5$ ) microbiota, with a more homogenous adult internal microbiota  
38 ( $p=0.12$ ; pseudo- $F = 1.6$ ) across collection sites. Overall, ASVs assigned to *Leucobacter*,  
39 *Thorsellia*, *Chryseobacterium* and uncharacterized *Enterobacteriaceae*, dominated F<sub>1</sub> larval  
40 internal microbiota, while *Acidovorax*, *Paucibacter*, and uncharacterized *Comamonadaceae*,  
41 dominated the larval cuticle surface. F<sub>1</sub> adults comprised a less diverse microbiota compared to  
42 larvae, with ASVs assigned to the genus *Asaia* dominating both internal and cuticle surface  
43 microbiota, and constituting at least 70% of taxa in each microbial niche.

44 **Conclusions:** These results suggest that location-specific heterogeneity in field mosquito  
45 microbiota can be transferred to F<sub>1</sub> progeny under normal laboratory conditions, but this may not  
46 last beyond the F<sub>1</sub> larval stage without adjustments to maintain field-derived microbiota. Our  
47 findings provide the first comprehensive characterization of laboratory-colonized F<sub>1</sub> *An.*  
48 *albimanus* progeny from field-derived mothers. This provides a background for studying how  
49 parentage and environmental conditions differentially or concomitantly affect mosquito  
50 microbiome composition, and how this can be exploited in advancing mosquito microbiome  
51 studies and their applications beyond laboratory settings.

52 **Keywords:** Mosquito microbiota, *Anopheles albimanus*, laboratory colonization, mosquito  
53 microbiome, next generation sequencing, 16S rRNA gene amplicon sequencing

## 54 **Background**

55 Mosquitoes contain microbes that inhabit various tissues, such as the alimentary canal,  
56 reproductive organs, and cuticle surface [1]. These microbes are thought to be principally  
57 obtained from the mosquito habitat during larval development, and from food sources at the  
58 adult stage [1]. In addition to acquisition from larval habitats and/or adult food sources,  
59 transovarial bacterial transmission from adult females to their eggs, and transstadial  
60 transmission across different immature stages, and into the adult stage, have been  
61 demonstrated [2, 3]. As a key component of the mosquito microbiota, environmentally-acquired  
62 microbes have been shown to affect mosquito life history traits such as the rate of pupation and  
63 adult body size [4]. The mosquito microbiota has also been shown to affect the following aspects  
64 of mosquito biology: immunity to human pathogens [5], reproduction [6], insecticide resistance  
65 [7, 8], and ultimately vector competence—the mosquito’s ability to acquire, maintain and transmit  
66 pathogens [5]. These effects of the microbiota on mosquito biology are being leveraged to  
67 develop novel approaches for mosquito-borne disease control [9].

68 The use of next generation molecular biology tools has resulted in extensive characterization of  
69 mosquito microbiota, with the initial focus on bacterial and archaeal components now expanding  
70 to eukaryotic microbes [10, 11] and viruses [12, 13]. These advances in mosquito microbiota  
71 research have led to field applications of mosquito symbionts for mosquito control. For *Aedes*  
72 *aegypti*, the principal vector of dengue, Zika, chikungunya and yellow fever viruses, mosquito-  
73 derived symbionts are now being used to suppress mosquito populations [14] and also being  
74 considered to control the spread of pathogens [15]. However, studies exploring mosquito  
75 symbionts for malaria control have largely remained at the laboratory stage [16, 17]. Similarly,  
76 the microbiota of mosquito vectors in some geographical regions are well characterized and  
77 studied compared to those from other regions. In malaria vectors for example, studies on the

78 microbiota have largely focused on Sub-Saharan African species—in particular, *Anopheles*  
79 *gambiae*—and to a lesser extent on those from Southeast Asia [18]. In contrast, the microbiota  
80 of Latin American malaria vectors have only recently been comprehensively characterized [7, 8,  
81 19-21], with these studies describing associations between *An. albimanus* microbiota and  
82 insecticide resistance [7, 8], and the factors that shape the composition of *An. darlingi*, *An.*  
83 *albimanus*, *An. nunezovari*, *An. rangeli*, and *An. triannulatus* microbiota [19-21].

84 To exploit the mosquito microbiota for malaria and malaria vector control, research must  
85 successfully advance from laboratory to field settings, a transition which can be fraught with  
86 challenges. For example, some malaria vectors such as *An. darlingi*, *An. vestitipennis*, and *An.*  
87 *gambiae* breed in sites that are small, temporary and often difficult to find and/or access [22-26],  
88 making it hard to obtain sufficient immature field mosquitoes for experiments. Where larval  
89 habitats are plentiful and easy to find and/or access, the subsequent rearing of field-collected  
90 mosquitoes to obtain uniform characteristics can pose additional challenges [27, 28].

91 Additionally, some malaria vectors belong to species complexes whose members are  
92 morphologically indistinguishable [29-32], constituting another layer of complexity that needs to  
93 be considered in elucidating mosquito-microbe interactions in malaria vectors.

94 These challenges, which are common to research on mosquito ecology and control, are often  
95 not reported or discussed in mosquito microbiome studies. Several failed attempts at collecting  
96 and rearing sufficient immature mosquitoes from the field for our previous study on the role of  
97 mosquito microbiota in insecticide resistance resulted in ultimately using either wild-caught  
98 adults [7] or F<sub>1</sub> progeny derived from field-collected adult mosquitoes [8, 33]. While field-caught  
99 adult mosquitoes or their F<sub>1</sub> progeny may offer insights into mosquito-microbe interactions in  
100 field scenarios, obtaining adult field-collected mosquitoes with uniform and/or controlled  
101 physiological characteristics is usually not feasible. Although geographically associated

102 heterogeneity in microbiota of field-collected mosquitoes has been previously described [34, 35],  
103 there is limited information on the fate of field-acquired microbiota after laboratory colonization of  
104 field-collected mosquitoes. So far, it has been observed that upon eclosion, newly-emerged  
105 laboratory-reared adult mosquitoes show a reduction in bacterial diversity in contrast to earlier  
106 developmental stages [36]. In addition, a recent study on the fate of field-acquired microbiota in  
107 laboratory-colonized *An. gambiae s.l.* showed a reduction in bacterial diversity of the F<sub>5</sub> progeny  
108 (the first point of measurement) that were reared in dechlorinated tap water in contrast to F<sub>0</sub> [37].  
109 Another study of *Ae. aegypti* from different geographical locations showed no associations  
110 between geographical location and microbiota composition after several generations of  
111 laboratory colonization [38]. At what point the microbiota of laboratory-colonized mosquitoes  
112 become homogenous and whether the microbiota of F<sub>1</sub> laboratory progeny represent their  
113 parental origin—and thus could be used for symbiont-based translational studies—remains  
114 largely undescribed.

115 Here, we present a comprehensive characterization of the microbiota of laboratory-reared F<sub>1</sub>  
116 progeny from field-caught adult *An. albimanus*. These represent unanticipated findings from a  
117 larger study that was aimed at characterizing the effects of insecticide exposure and resistance  
118 on *An. albimanus* microbiota [8]. We expected little or no immediate loss of geographical  
119 heterogeneity in microbial composition upon initial laboratory colonization based on evidence of  
120 this type of heterogeneity in field-derived populations [34, 35]. However, our data showed  
121 geographical heterogeneity in both F<sub>1</sub> larval internal and cuticle surface microbiota, and only F<sub>1</sub>  
122 adult cuticle surface microbiota, with a more homogenous adult internal microbiota. These  
123 findings lay the foundations for studying how parentage and environmental conditions  
124 differentially or concomitantly affect mosquito microbiome composition, and how this can be

125 exploited in advancing mosquito microbiome studies and their applications beyond laboratory  
126 settings.

## 127 **Results**

128 Using high throughput deep sequencing of the universal bacterial and archaeal 16S rRNA gene,  
129 we characterized the microbiota of the internal and cuticle surface microbial niches of laboratory  
130 reared *An. albimanus* F<sub>1</sub> larvae (n=132) and adult (n=135) progeny originating from mothers that  
131 were collected from four locations in south central Guatemala (Fig 1). Mosquitoes were  
132 processed as pools (3 individuals per pool), resulting in a total of 44 larval and 45 adult pools. F<sub>1</sub>  
133 larvae were from El Tererro, Las Cruces 3 and Las Cruces 4, while F<sub>1</sub> adults were from Las  
134 Cruces 1, Las Cruces 3 and Las Cruces 4 (Table 1). Following quality control of the resulting  
135 sequencing reads, amplicon sequence variants (ASVs) were identified and used in downstream  
136 analysis. Since adult mosquito microbiota is distinct from that of immature stages [39, 40], ASVs  
137 from larvae and adults were analyzed separately, as were ASVs from each microbial niche  
138 (internal or cuticle surface).

139

### 140 **Internal and cuticle surface microbiota of laboratory colonized F<sub>1</sub> *An. albimanus* larvae** 141 **differed by geographic origin**

142 Non-pairwise Bray-Curtis distance comparison showed significant differences in internal  
143 ( $p=0.001$ ) and cuticle surface ( $p=0.001$ ) microbiota between F<sub>1</sub> larvae from different collection  
144 sites. Thus, irrespective of microbial niche, the microbial community structure (composition and  
145 relative abundance of ASVs) of F<sub>1</sub> laboratory-colonized larvae differed by collection location.  
146 Pairwise PERMANOVA comparison of Bray-Curtis distances further showed significant  
147 differences in microbial community structure in larval internal ( $q<0.01$ ) and cuticle surface  
148 microbiota ( $q<0.01$ ) between every pair of collection site (Table 2a). This location-driven  
149 heterogeneity in microbial community structure was further demonstrated by principal coordinate



150 analysis (PCoA), where  $F_1$  larval internal and cuticle surface microbiota clustered distinctly by  
151 collection site (Fig. 2).

152 Non-pairwise Shannon diversity comparisons showed significant differences in internal  
153 ( $p=0.009$ ) but not cuticle surface ( $p=0.09$ ) microbiota of  $F_1$  laboratory-colonized larvae from  
154 different collection sites, indicating that there was inter-sample variation in the diversity of  
155 internal but not cuticle surface microbiota of larvae when all collection sites were taken into  
156 consideration. A pairwise Kruskal-Wallis comparison of Shannon diversity indices showed that  
157 the inter-sample variation in diversity of larval internal microbiota held true when every pair of  
158 collection sites was considered except between Las Cruces 3 and 4 (Table 2b and Suppl. 1).  
159 Larvae originating from Las Cruces 3 had the highest internal microbiota diversity, followed by  
160 Las Cruces 4 and El Terrero (Suppl. 1)

161

162 **Cuticle surface, but not internal, microbiota of laboratory colonized  $F_1$  adult *An.***  
163 ***albimanus* differed by geographic location**

164 Non-pairwise Bray-Curtis diversity comparisons showed significant differences in cuticle surface  
165 ( $p=0.001$ ), but not internal microbiota ( $p=0.12$ ) between adult  $F_1$  mosquitoes from different  
166 collection sites, suggesting a loss of location-driven heterogeneity in microbial community  
167 structure in internal but not cuticle surface microbial niche of laboratory-colonized  $F_1$  adults.  
168 Pairwise PERMANOVA comparisons of Bray-Curtis distances also showed significant  
169 differences in microbial community structure of  $F_1$  adult cuticle surface microbiota ( $q<0.01$ )  
170 between every pair of collection sites (Table 2a). These results were corroborated by PCoA  
171 which showed that  $F_1$  adult cuticle surface microbiota, but not internal microbiota, clustered  
172 distinctly by collection site (Fig. 2).

173 Non-pairwise Shannon diversity comparisons showed no differences in the internal ( $p=0.42$ ) or  
174 cuticle surface ( $p=0.4$ ) microbiota of  $F_1$  adults from different collection sites, indicating that there  
175 was little or no inter-sample variation in diversity of  $F_1$  adult microbiota when all collection sites  
176 were taken into consideration. Pairwise Kruskal-Wallis comparisons of Shannon diversity indices  
177 also detected no inter-sample variation in diversity of  $F_1$  adult cuticle surface or internal  
178 microbiota when every pair of collection site was considered (Table 2b and Suppl. 1).

179 **Laboratory-colonized  $F_1$  *An. albimanus* larvae comprised a rich and diverse microbiota**  
180 **that differed by geographic location**

181 Overall, ASVs from larval internal microbiota were assigned to 180 bacterial taxa, and cuticle  
182 surface microbiota to 194 bacterial taxa (suppl. 2.). A majority of these taxa across all locations  
183 (ranging from 118-139 taxa) were shared between the internal and cuticle surface microbiota  
184 (Fig 3a), as well as across collection sites ( $n=110$  for cuticle surface and  $n=117$  for internal  
185 microbiota) (Fig 3b). While a majority of the identified microbial taxa were shared between both  
186 microbial niches, their abundance was generally higher in internal (Fig 4a) compared to cuticle  
187 surface (Fig 4b) microbiota. Although a majority of identified microbial taxa in both internal and  
188 cuticle surface microbiota were shared across all locations, their abundance differed by location  
189 (Fig 4a, 4b and 5).

190 In general, larval internal microbiota was dominated by ASVs identified as an uncharacterized  
191 *Enterobacteriaceae*, *Leucobacter*, *Thorsellia*, and *Chryseobacterium* (Fig 4a), together making  
192 up over 50% of ASVs (Suppl. 2). In contrast, *Acidovorax*, uncharacterized *Comamonadaceae*,  
193 and *Paucibacter* (Fig 4b) made up over 50% of ASVs detected on the larval cuticle surface  
194 (Suppl. 2).

195 A few predominant bacterial taxa were present in the larval internal microbial niche across all  
196 three collection sites: unclassified *Enterobacteriaceae*, *Thorsellia*, *Rhizobium*, *Xantobacter*,  
197 *Acidovorax* and *Pirellula* (Fig 4a.), with remaining taxa showing different patterns of abundance  
198 between collection sites (Fig 5 and Suppl. 2). For example, ASVs assigned to the genus  
199 *Azoracus* were predominant in larvae from El Terrero, while *Singulisphaera*, *Paucibacter*,  
200 *Ancylobacter*, *Gemmobacter*, and *Rayranella* were predominant in those from Las Cruces 3.  
201 Predominant in larvae from Las Cruces 3 and Las Cruces 4 were *Azospirillum*, *Bosea* and  
202 *Microbacterium*; and in those from El Terrero and Las Cruces 3 were *Terrimicrobium* and  
203 *Legionella* (Fig 5). Although outside of the cut off limit set for differential abundance, ASVs  
204 assigned to the bacterial genera *Leucobacter* were predominant in the internal microbiota of  
205 larvae from Las Cruces 4 and El Terrero, but predominant in only three of the 14 sample  
206 replicates from Las Cruces 3 (Fig 4a). Similarly, *Chryseobacterium* was predominant in Las  
207 Cruces 4 and 3, but only predominant in six of the 16 pools of larvae from El Terrero. Bacterial  
208 taxa that were unique to each location comprised <8% of all taxa in larval internal microbiota  
209 (Suppl. 3b), and were below the threshold for inclusion in the heatmap and differential  
210 abundance testing (Suppl. 2).

211 Unlike the internal microbial niche, no microbial taxa was predominant in larval cuticle surface  
212 microbiota across all three collection sites. However, some taxa showed notable patterns of  
213 abundance between locations (Fig 5). These included the genus *Azoarcus*, which was detected  
214 at low to moderate frequencies in 13 of 15 pools of larvae from El Terrero, at low frequency in a  
215 single pool of larvae from Las Cruces 3, and was not detected at all in Las Cruces 4 (Fig 4b and  
216 6). Similarly, ASVs assigned to the genus *Spirosoma* were detected at moderate frequencies in  
217 all pools of larvae from Las Cruces 4, but only in a few pools from the other two locations. ASVs  
218 assigned to the genus *Paucibacter* were present at relatively higher abundance in larvae from

219 both Las Cruces 3 and El Terrero compared to those from Las Cruces 4. Those assigned to the  
220 genus *Acidovorax* were predominant in larvae from Las Cruces 3 and Las Cruces 4 in contrast  
221 to El Terrero. ASVs assigned to *Microbacterium*, *Bdellovibrio* and *Pelomonas* were present at  
222 moderate frequencies in larvae from both Las Cruces 3 and Las Cruces 4 but were not detected  
223 in El Terrero (Fig. 5). Bacterial taxa that were unique to each collection site comprised <8% of  
224 larval cuticle surface microbiota (Fig 3b), and were below the threshold for inclusion in the  
225 heatmap and differential abundance testing (Suppl. 2).

226

227 **Laboratory-colonized adult F<sub>1</sub> *An. albimanus* were comprised of sparse internal and**  
228 **cuticle surface microbiota that were dominated by ASVs assigned to the genus *Asaia***  
229 ASVs from adult internal microbiota were assigned to 62 microbial taxa and cuticle surface  
230 microbiota were assigned to 106 microbial taxa. Two of these ASVs which were only present in  
231 the cuticle surface microbiota were classified as archaea, while all other remaining ASVs were  
232 classified as bacteria (Suppl. 2). Unlike larval microbiota, less than half of the assigned taxa  
233 across all locations (ranging from 19-37 taxa) were shared between internal and cuticle surface  
234 microbiota (Fig 3a), and only 18 taxa on the cuticle surface and 19 internal taxa were shared  
235 across all maternal collection sites (Fig 3b).

236 Overall, ASVs assigned to the bacterial genus *Asaia* dominated both adult internal and cuticle  
237 surface microbiota (Fig 6), constituting at least 70% of taxa in each microbial niche (Suppl. 2). A  
238 majority of identified taxa in adult internal, but not cuticle surface, microbiota was detected  
239 across all three collection sites, with a few of these taxa present in high abundance across all  
240 collection sites (Fig. 6). Across all three collection sites, ASVs assigned to the genera  
241 *Acinetobacter*, *Gluconobacter*, *Pantoea* and *Pseudomonas* were present in moderate to high  
242 abundance in adult internal microbiota in addition to *Asaia* (Fig 6).

243 No site-specific microbial taxa were identified in adult cuticle surface microbiota, as the ASV  
244 distribution did not meet the criteria for this type of analysis. This was compounded by  
245 dominance (>70%) of ASVs that were assigned to the bacterial genus *Asaia* (Suppl. 2). In  
246 addition, the cuticle surface microbiota of adults originating from Las Cruces 4 comprised 43% of  
247 all adult cuticle surface microbial taxa (Fig 3b), although a majority were of low abundance.

248 **Discussion**

249 The scientific community is increasingly investigating the role of mosquito microbiota in fighting  
250 mosquito-borne diseases [9]. The successful transition of mosquito microbiome research from  
251 laboratory to field requires a comprehensive understanding of the dynamics underlying the  
252 composition of the microbiota of field-collected mosquitoes and their progeny. We provide a  
253 comprehensive characterization of the internal and cuticle surface microbiota of laboratory-  
254 reared F<sub>1</sub> progeny from field-caught adult *An. albimanus* that were collected from different  
255 locations. Our results show that while location-driven heterogeneity in the microbial community  
256 structure of both internal and cuticle surface microbiota was present in the F<sub>1</sub> larvae, this  
257 heterogeneity was only evident in the cuticle surface microbiota of adult progeny from the same  
258 generation. This work provides comprehensive fundamental data for studying how parentage  
259 and environmental conditions differentially or concomitantly affect mosquito microbiome  
260 composition.

261 Previous studies on other mosquito species have also shown a loss of field-acquired internal  
262 mosquito microbiota following several generations of laboratory colonization [37, 38]. Until now,  
263 however, the laboratory generation at which this loss occurs was largely undescribed. Our study  
264 represents an initial step in filling this knowledge gap and provides further details regarding the  
265 dynamics of changes in both the internal and cuticle surface microbial niches. The homogeneity  
266 in internal microbiota of F<sub>1</sub> adults is suggestive of a loss of field-acquired microbiota, which may  
267 have implications for studies that rely on laboratory progeny in lieu of field populations [25, 27,  
268 28]. Previous findings showed that rearing mosquitoes in water from the field could preserve the  
269 field-derived internal microbiota in laboratory-colonized adult progeny of *An. gambiae s. l.* for  
270 several generations [37]. In addition, other studies, have shown that the microbiota in larval  
271 habitat water significantly influences the internal microbiota of emerging adult mosquitoes [40,

272 41]. Thus, preserving wild-type microbiota in  $F_1$  progeny could be an avenue for studying  
273 mosquito-microbe dynamics in the field.

274 Maternal egg-smearing has been proposed as a mechanism through which adult female  
275 mosquitoes and other insects transfer microbes to their progeny [42-45]. This egg-smearing  
276 could explain the heterogeneity observed in internal and cuticle surface microbiota between  $F_1$   
277 larvae with different maternal origins. On the other hand, a lack of this heterogeneity in the  
278 internal microbiota of adult progeny could be attributed to the physiological changes that occur  
279 during metamorphosis and adult eclosion, whereby elimination of the larval meconial peritrophic  
280 membrane and meconium (midgut and midgut content), along with ingestion of exuvial fluid—  
281 which is said to be bactericidal—results in sterile or nearly sterile midguts in newly emerged  
282 adults [39, 46]. This could additionally be explained by mechanisms that regulate the  
283 composition of adult mosquito internal microbiota [47-49]. Conversely, the heterogeneity in  
284 cuticle surface microbiota between adult progeny originating from different maternal sites,  
285 suggests that maternally derived microbes in the rearing trays may have colonized adult cuticle  
286 surfaces during emergence. The mechanisms underlying the assemblage of the mosquito cuticle  
287 surface microbiome are largely undescribed, and thus require further investigation.

288 The low inter-sample variation in microbial diversity observed in this study has largely been  
289 described in laboratory mosquito colonies [38, 50]. The microbial composition of laboratory-  
290 reared larvae is typically less diverse [50, 51] compared to those of field-derived larvae, but our  
291 laboratory-reared larvae exhibited a rich microbial composition that was comparable to those of  
292 field populations [39, 40]. In contrast, our adult progeny had a less diverse microbial composition  
293 that was reflective of typical laboratory-reared adult mosquitoes [36, 52]. Further suggesting that  
294 field-acquired microbiota, although transferred to laboratory progeny, may be lost within one  
295 generation of laboratory colonization—particularly at the adult stage.

296 In this study, we detected microbial taxa that have previously been identified in *Anopheles* and  
297 other mosquito genera [7, 41, 53, 54]. While a majority of the taxa in F<sub>1</sub> larvae were shared  
298 between both the internal and cuticle surface microbial niches, a greater abundance of microbial  
299 taxa was detected in the internal microbial niche compared to the cuticle surface. The cuticle  
300 surface microbiota of mosquitoes and other hematophagous insects are largely uncharacterized  
301 and the mechanisms underlying their assemblage remain unknown. As such, we hypothesize  
302 that although both internal and cuticle surface niches are exposed to the same water from which  
303 the microbiota is derived, a more conducive and/or selective internal environment could allow for  
304 greater proliferation of colonizing bacteria. In F<sub>1</sub> adults however, less than half of the detected  
305 microbial taxa were shared between the internal and cuticle surface microbial niches, suggesting  
306 differences in physiological conditions that favor microbial colonization, and corroborating  
307 findings that point toward microbial regulatory mechanisms within the mosquito midgut [47-49].  
308 Although a few microbial taxa overlapped between adult internal and cuticle surface microbial  
309 niches and the most abundant taxa were shared, many of the unshared taxa have been  
310 previously detected in adult mosquitoes including *Anopheles* [1, 54, 55], indicating that the  
311 cuticle surface microbiota characterized in this study are inherently associated with mosquitoes.  
312 Like the larval microbiota, there was a higher abundance of microbial taxa in the adult internal  
313 microbial niche compared to the cuticle surface, further supporting the hypothesis of a more  
314 conducive and/or selective internal environment.

315 With the exception of the adult cuticle surface microbial niche, a majority of all detected microbial  
316 taxa overlapped between collection sites in both F<sub>1</sub> larvae and adults, albeit with differing  
317 abundances. This reflects restrictions imposed by controlled laboratory environments in the  
318 development of mosquito microbiota. In both microbial niches of both larvae and adults,  
319 microbial taxa that were specific to collection sites were low in abundance, compared to the



320 moderate to high abundance of those that were shared across all locations. This was particularly  
321 true for *Asaia*—notorious for rapidly colonizing laboratory mosquitoes [56]—which constituted at  
322 least 70% of both adult internal and cuticle surface microbiota from progeny across all collection  
323 sites. These results suggest that field-acquired mosquito microbiota may be lost in as early as  
324 the first generation of laboratory colonization.

325 We recognize that not having the microbial community profiles of the mothers from which the  $F_1$   
326 progeny were derived is a limitation of this study. However, the findings herein provide empirical  
327 data on the composition of laboratory reared  $F_1$  *An albimanus* microbiota from different  
328 locations. It provides a foundation for exploring the role of parentage, environmental conditions,  
329 and inherent host physiological characteristics on the assemblage of the mosquito microbiome,  
330 as well as the fate of field-derived microbes upon laboratory colonization. This is critical for  
331 advancing mosquito microbiome studies and their applications beyond laboratory settings.

## 332 **Methods**

333 The findings presented here extend those of a larger study [8]. Thus, the mosquito collection,  
334 processing and sequencing procedures have previously been described in detail [8].

### 335 **Mosquito collections and laboratory generation of F<sub>1</sub> progeny**

336 Gravid and/or blood-fed adult female *An. albimanus* were sampled across four field sites in the  
337 villages of Las Cruces and El Terrero, in La Gomera, department of Escuintla, Guatemala  
338 (Figure 1). Field-collected mosquitoes from each location were held in separate paper cups,  
339 sustained on 10% sucrose solution, and transported to the insectary at Universidad del Valle de  
340 Guatemala in Guatemala City for species identification, oviposition and subsequent rearing of F<sub>1</sub>  
341 progeny. Mosquitoes that were morphologically identified as *An. albimanus* following  
342 identification keys [57] (approximately 300 in total) were subjected to oviposition, and a  
343 subsample of the resulting F<sub>1</sub> progeny was used for molecular verification of species identity as  
344 described below. A modified oviposition procedure [58] was employed, wherein no more than 70  
345 gravid females from the same location were placed in quart size paper ice cream containers with  
346 distilled water to a depth of at least 2 cm. The containers were covered with fine mesh fabric that  
347 were secured with rubber bands prior to the introduction of gravid field-caught adult *An.*  
348 *albimanus*. The mesh was topped with cotton balls soaked in 10% sucrose to sustain the  
349 mosquitoes, and subsequently covered with a thick piece of black plastic bag to keep the  
350 containers dark and trap in moisture. The oviposition chambers were held under the following  
351 insectary conditions; 27±2°C, 80±10% relative humidity, and 12-h light-dark cycle. After at least  
352 48 h, the adult females were removed and discarded as they were not needed for the original  
353 study. The F<sub>1</sub> eggs were collected, pooled by location and reared separately under identical  
354 ambient conditions (as described above) and the following larval feeding regimen. Eggs were

355 washed into 18 x 14 x 3 inch plastic larval trays (approximately 200 eggs per tray) containing  
356 distilled water to a depth of at least 2 cm, and 3-4 drops of 10% yeast solution. Hatched larvae  
357 were sustained on finely ground Koi fish food (Foster & Smith, Inc. Rhinelander, WI) until  
358 pupation. At the third to fourth larval instar stage (L3-L4), half of the larvae were separated and  
359 used for bioassays in the original study and subsequently processed for microbiota  
360 characterization (n=132). Using a stereo microscope, female pupae from the remaining  
361 mosquitoes were separated into 8 oz. paper ice cream cups and placed into cardboard cages for  
362 adult eclosion. The resulting F<sub>1</sub> adult virgin female mosquitoes were sustained on 10% sucrose  
363 solution until they were 2-5 days old and also used for bioassays in the parent study. These  
364 were subsequently processed for microbiota characterization (n=135). Post bioassays, larval  
365 and adult samples were preserved in RNALater® solution (Applied Biosystems, Foster City,  
366 CA), shipped on dry ice to the US Centers for Disease Control and Prevention (CDC) in Atlanta,  
367 USA, and stored at -80 °C until further processing. Samples originating from different geographic  
368 locations were handled, stored and processed separately.

369 **Genomic DNA extraction from mosquito legs, whole mosquito samples, and mosquito**  
370 **cuticle surfaces**

371 Stored mosquito samples were thawed overnight at 4°C, and the thawed RNALater® solution  
372 was discarded. This was followed by a rinse with nuclease-free water to remove any residual  
373 RNALater®. Legs from a subsample of individual F<sub>1</sub> adults were removed using sterile forceps  
374 and placed in individual sterile 1.5 mL Eppendorf tubes containing 75 µL Extracta DNA Prep  
375 solution (Quantabio, Beverly, MA) for DNA extraction following manufacturer's instructions. Both  
376 larvae and adult (with and without legs removed) F<sub>1</sub> samples were pooled for whole body and  
377 cuticle surface DNA extractions. Each pool comprised 3 individuals, resulting in 44 pools of  
378 larvae and 45 pools of adults. Table 1 shows the number of pools (replicates) processed per life

379 stage and collection site. To obtain cuticle surface samples, each pool was submerged in 500  $\mu$ L  
380 of nuclease free water and washed vigorously by agitating with a vortex mixer for at least 15  
381 seconds. The resulting wash water was transferred to new sterile tubes for DNA extraction. We  
382 acknowledge that some microbes may have been lost via rinsing off the preservative  
383 (RNALater® solution) prior to this step. A comprehensive (comparable or more than the internal  
384 community) microbial community was nonetheless recovered from the cuticle surface samples.  
385 The washed sample pools were further surface sterilized using two vigorous washes; first in 70%  
386 ethanol, then nuclease free water, each with at least 15 seconds agitation on a vortex mixer.  
387 This was followed by one gentle rinse with nuclease free water. Genomic DNA from the surface-  
388 sterilized samples and wash water (subsequently referred to as internal and cuticle surface,  
389 respectively) was isolated using the TissueLyser II and DNeasy Blood and Tissue Kit (QIAGEN,  
390 Hilden, Germany) as follows: in individual 2 mL sterile tubes, 180  $\mu$ L of buffer ATL (QIAGEN)  
391 and 5 mm diameter stainless steel beads (QIAGEN) were added to each sample pool. With the  
392 following settings: 30 hz/s for 8 and 15 minutes for internal and cuticle surface samples  
393 respectively, samples were homogenized using the TissueLyser (QIAGEN) fitted with two sets of  
394 96-well adapter plates that held the tubes. The plates were rotated every minute during  
395 homogenization, and afterwards, samples were transferred into new sterile 1.5 mL Eppendorf  
396 tubes for the remaining part of the DNA extraction process. 20  $\mu$ L of Proteinase K (QIAGEN)  
397 was added to each homogenized sample and incubated overnight at 56 °C, after which 200  $\mu$ L  
398 of buffer AL (QIAGEN) was added and incubated for a further 2 h at the same temperature. The  
399 remaining steps were performed according to QIAGEN's spin-column protocol for purification of  
400 DNA from animal tissues, and the purified DNA was eluted in 70  $\mu$ L of buffer AE (QIAGEN). Two  
401 sets of two blank controls (without samples) were processed alongside the internal and cuticle  
402 surface samples, and all steps, along with those described below, were performed under sterile

403 conditions. The purified genomic DNA from samples and blank controls were stored at -80 °C  
404 until further processing.

#### 405 **Molecular species confirmation of *An. albimanus* and 16S rRNA amplicon sequencing**

406 DNA samples from mosquito legs were used as templates to amplify the second internal  
407 transcribed spacer region (ITS2) of the mosquito ribosomal DNA in order to verify morphological  
408 identification of *An. albimanus*. This was achieved by conventional PCR using the universal ITS2  
409 primers (ITS2 A: TGTGAACTGCAGGACACAT and ITS2 B: TATGCTTAAATTCAGGGGGT) for  
410 distinguishing members of *Anopheles* complexes [59]. With a final reaction volume of 25 µL,  
411 each PCR comprised ≥100 ng/µL DNA template, 15 µM of each primer, 12.5 µL of 2X AccuStart  
412 II PCR SuperMix (Quantabio, Beverly, MA), and PCR grade water to final volume. With the  
413 following conditions, initial denaturation at 94 °C for 4 min, then 35 cycles of 94 °C for 30 s,  
414 53 °C for 40 s, and 72 °C for 30 s, followed by a final extension for 10 min at 72 °C, the  
415 reactions were performed using a T100™ Thermal Cycler (Bio-Rad, USA). Using EtBr-stained  
416 agarose gel electrophoresis, the amplified products sized ~500 bp, confirmed all samples as *An.*  
417 *albimanus* [60].

418 DNA from internal and cuticle surface samples, along with those from blank controls, were used  
419 as templates to amplify the universal bacterial and archaeal 16S rRNA gene. This was also  
420 achieved by conventional PCR using universal primers targeting the v3-v4 region of the 16S  
421 rRNA gene (341F:  
422 **TCGTCGGCAGCGTCAGATGTGTATAAGAGACAG**CCTACGGGNGGCWGCAG, and 805R:  
423 **GTCTCGTGGGCTCGGAGATGTGTATAAGAGACAG**ACTACHVGGGTATCTAATCC), each  
424 with Illumina® (San Diego, CA USA) adapters (bold typeface). With a final reaction volume of 25  
425 µL, each PCR comprised; ≥20 ng/µL DNA template, 5 µM of each primer, 10 µL of 2x KAPA

426 HiFi HotStart PCR mix (Roche, Switzerland), and PCR grade water to final volume. Three  
427 negative controls with PCR grade water substituted for DNA template, were processed along  
428 with the samples. The reactions were performed using the T100™ Thermal Cycler (Bio-Rad,  
429 USA) under the following conditions; initial denaturation at 95°C for 3 min, then 25 cycles of  
430 95°C, 55°C, and 72°C for 30s each, followed by a final extension for 5 min at 72°C.  
431 The amplification products, sized ~460 bp, were verified by electrophoreses as described above  
432 and quantified using a NanoDrop™ spectrophotometer (Thermo Fisher Scientific, Waltham,  
433 MA). Amplicons, including PCR products from blanks and negative controls, which yielded no  
434 bands following electrophoresis, were purified using Agencourt AMPure XP beads (Beckman  
435 Coulter Inc., Indianapolis, IN, USA) at 0.7X (internal) or 0.875X (cuticle surface) sample volume,  
436 and eluted in 40 µL of 10 mM Tris buffer (pH 8.5).

437 All purified products, including those of blanks and negative controls, were used as templates for  
438 sequencing library preparation. This was accomplished via index PCR using the Nextera XT  
439 Index kit v2 sets, A, B and D (Illumina, San Diego, CA). With a final reaction volume of 50 µL,  
440 each index PCR comprised; 25 µL NEBNext High-Fidelity 2X PCR master mix (New England  
441 Biolabs Inc., Ipswich, MA), 5 µL of each index primer, 10 µL of purified PCR products (0–  
442 20 ng/µL) as template, and PCR grade water to final volume. The PCRs were performed under  
443 the following reaction conditions; 98°C for 30s, then 8 cycles of 98°C for 10s, 55°C and  
444 65°C for 30s each, and a final extension at 65°C for 5 min, and resulting libraries were  
445 also cleaned using Agencourt AMPure XP beads (Beckman Coulter Inc., Indianapolis, IN, USA)  
446 at 1.2X sample volume and eluted in 25 µL of 10 mM Tris buffer (pH 8.5). The libraries were  
447 subsequently analyzed for size and concentration, normalized to 2 nM, pooled and denatured  
448 following Illumina guidelines for loading onto flowcells. Sequencing was performed on an  
449 Illumina HiSeq 2500 machine, using 2x250 cycle paired-end sequencing kits.

## 450 **Preprocessing of sequencing reads**

451 Sequencing outputs were demultiplexed and converted to the fastq format for downstream  
452 analysis using the bcl2fastq (v2.19) conversion software (Illumina®). A total of 115,250,077  
453 demultiplexed paired-end sequencing reads, with a maximum length of 250 bp were initially  
454 imported into the 'quantitative insights into microbial ecology' pipeline, QIIME2 v.2017.7.0 [61],  
455 and further sequencing read processing and analysis were performed in v.2018.2.0 of the  
456 pipeline. Using the DADA2 plugin in QIIME 2 [62], the `denoise-paired` command with the  
457 following options; `trunc_len_f: 244, trunc_len_r: 244, and n_reads_learn:`  
458 `500000`, was used to correct errors, remove chimeras and merge paired-end reads. The  
459 resulting amplicon sequence variants (ASVs; n=30,956,883) were further filtered to remove  
460 potentially extraneous ASVs (those with <100 counts) and ASVs that were associated with  
461 blanks and negative controls. This last filtering step resulted in 17,225,776 ASVs, ranging from  
462 3,277 to 223,222 per sample (mean 96,774), that were used for downstream comparison of  
463 bacterial composition and taxonomic analysis. Suppl. 3. shows sequencing reads and ASV  
464 summary statistics.

## 465 **Diversity indices**

466 Analysis of microbial diversity within (alpha diversity) and between (beta diversity) samples were  
467 performed in QIIME2 using the Shannon diversity index and Bray-Curtis dissimilarity index,  
468 respectively. The Shannon diversity indices were calculated using rarefied ASVs counts per  
469 sample, in which ASVs per sample were selected randomly without replacement at an even  
470 depth (Suppl. 4) for ten iterations. The resulting average Shannon indices are presented and  
471 were compared between samples using pairwise Kruskal-Wallis tests with Benjamini-Hochberg  
472 false discovery rate (FDR) corrections for multiple comparisons.

473 The Bray-Curtis dissimilarity indices were computed with or without rarefaction, and resulting  
474 indices were compared between samples using pairwise PERMANOVA tests (999 permutations)  
475 with FDR corrections. There were no discernable differences between results of rarefied and  
476 non-rarefied data. Thus, results of Bray-Curtis dissimilarity indices using non-rarefied data were  
477 visualized by Principal Co-ordinates Analysis (PCoA) plots in R [63] using the phyloseq R  
478 package [64].

479 Significance for both pair-wise analyses was set to  $q < 0.05$  (i.e. post FDR  $p$ -value corrections).

#### 480 **Taxonomic analysis and differentially abundant microbial taxa**

481 Taxonomic analysis of ASVs was performed using QIIME2's pre-trained Naïve Bayes classifier  
482 [65] and `q2-feature-classifier` plugin [66]. Prior to analysis, the classifier was trained on the  
483 QIIME-compatible 16S SILVA reference (99% identity) database v.128 [67], and using the  
484 `extract-reads` command of the `q2-feature-classifier` plugin, the reference sequences  
485 were trimmed to the v3-v4 region (425 bp) of the 16S rRNA gene. The relative abundance of  
486 annotated ASVs across samples were subsequently visualized using the `qiime feature-`  
487 `table heatmap` plugin based on Bray-Curtis distances with the plugin's default clustering  
488 method. Only annotated ASVs with counts  $\geq 2000$  (larvae) or  $\geq 1000$  (adults) were included in  
489 the heatmaps.

490 Differentially abundant microbial taxa across locations were identified using QIIME2's analysis of  
491 composition of microbiomes (ANCOM) [68] plugin. The cut-off for differential abundance was set  
492 to an effect size of  $\log F \geq 20$  and  $W \geq 20$ , i.e. a taxon was differentially abundant across collection  
493 sites if the ratio of its abundance to those of at least 20 other taxa (25% of all included taxa)  
494 differed significantly across sites.



495 Prior to each analysis, ASV frequency data was normalized by  $\log_{10}$  transformation following the  
496 addition of pseudocounts of 1. To ensure that filtering of low frequency reads did not  
497 compromise our findings, all downstream analyses were also performed with these reads  
498 included, and results (Suppl 5) were consistent with those of the clean/filtered dataset. Results  
499 of the clean dataset are subsequently discussed.

500 The outputs of data analyses were aesthetically formatted using Inkscape [69].

501 **Declarations**

502 **Ethics approval and consent to participate:** Not applicable

503 **Consent for publication:** Not applicable

504 **Availability of data and material:** The raw sequencing reads generated from this project,  
505 including those from negative controls (blanks), have been deposited in the National Center for  
506 Biotechnology Information (NCBI), Sequence Read Archive under the BioProject  
507 PRJNA512122.

508 **Competing interests:** The authors declare that they have no competing interests

509 **Funding:** This work was supported by the US Centers for Disease Control and Prevention  
510 (CDC) through the American Society for Microbiology's (ASM) Infectious Disease and Public  
511 Health Microbiology Postdoctoral Fellowship awarded to ND<sup>†</sup>, and the CDC's Advanced  
512 Molecular Detection (AMD) program.

513 **Author contributions:** ND<sup>†</sup> & AL conceptualized and designed the study; NP facilitated and  
514 provided facilities for field work; ND<sup>†</sup>, ACB, FL & JCL performed mosquito collections, and mass  
515 rearing; ND<sup>†</sup> & MS performed molecular analysis and sequencing; ND<sup>†</sup> analyzed the data; ND<sup>†</sup>  
516 and ND performed the data visualizations; ND<sup>†</sup> drafted the manuscript; all authors reviewed and  
517 approved the final version of the manuscript.

518 **Acknowledgements**

519 We thank the cattle coral owners in Escuintla, Guatemala for permission to conduct mosquito  
520 collections on their corals, without which this study would not have been possible; the Malaria  
521 Research and Reference Reagent Resource Center (MR4) for providing the ITS2 primers used

522 for *Anopheles albimanus* species identification; Nelson Jimenez and Ricardo Santos from the  
523 Ministerio de Salud Publica y Asistencia Social (MSPAS) for assistance during mosquito  
524 collections; Daniela Da'Costa, Pedro Peralta, Adel Mejia and Alfonso Salam from Universidad  
525 del Valle de Guatemala (UVG) for field support and assistance during mosquito rearing; and  
526 appreciate comprehensive feedback from two anonymous reviewers on an earlier version of this  
527 manuscript—these have (re)shaped how the findings herein are presented and discussed. The  
528 adult mosquito icon used in Fig. 1 was created by MarkieAnn Packer from the Noun Project.

529 The findings and conclusions in this paper are those of the authors and do not necessarily  
530 represent the official position of the US Centers for Disease Control and Prevention (CDC) or the  
531 American Society for Microbiology (ASM).

532 **Authors' information:** ND<sup>†</sup> present address: Tropical Infectious Disease Research Center,  
533 University of Abomey-Calavi, Cotonou, Benin

534 <sup>†</sup>Nsa Dada

535

## 536 References

- 537 1. Guégan M, Zouache K, Démichel C, Minard G, Tran Van V, Potier P, et al. The mosquito  
538 holobiont: fresh insight into mosquito-microbiota interactions. *Microbiome*. 2018;6(1):49. doi:  
539 10.1186/s40168-018-0435-2.
- 540 2. Coon KL, Brown MR, Strand MR. Mosquitoes host communities of bacteria that are  
541 essential for development but vary greatly between local habitats. *Molecular Ecology*.  
542 2016;25(22):5806-26. doi: 10.1111/mec.13877.
- 543 3. Lindh JM, Borg-Karlson AK, Faye I. Transstadial and horizontal transfer of bacteria within  
544 a colony of *Anopheles gambiae* (Diptera: Culicidae) and oviposition response to bacteria-  
545 containing water. *Acta Tropica*. 2008;107(3):242-50. doi:  
546 <http://dx.doi.org/10.1016/j.actatropica.2008.06.008>.
- 547 4. Dickson LB, Jiolle D, Minard G, Moltini-Conclois I, Volant S, Ghoulane A, et al. Carryover  
548 effects of larval exposure to different environmental bacteria drive adult trait variation in a  
549 mosquito vector. *Science Advances*. 2017;3(8). doi: 10.1126/sciadv.1700585.
- 550 5. Dennison NJ, Jupatanakul N, Dimopoulos G. The mosquito microbiota influences vector  
551 competence for human pathogens. *Current opinion in insect science*. 2014;3:6-13. doi:  
552 10.1016/j.cois.2014.07.004. PubMed PMID: PMC4288011.
- 553 6. Coon KL, Brown MR, Strand MR. Gut bacteria differentially affect egg production in the  
554 anautogenous mosquito *Aedes aegypti* and facultatively autogenous mosquito *Aedes atropalpus*  
555 (Diptera: Culicidae). *Parasites & Vectors*. 2016;9(1):375. doi: 10.1186/s13071-016-1660-9.
- 556 7. Dada N, Sheth M, Liebman K, Pinto J, Lenhart A. Whole metagenome sequencing  
557 reveals links between mosquito microbiota and insecticide resistance in malaria vectors.  
558 *Scientific Reports*. 2018;8(1):2084. Epub 2018/02/03. doi: 10.1038/s41598-018-20367-4.  
559 PubMed PMID: 29391526; PubMed Central PMCID: PMC5794770.
- 560 8. Dada N, Lol JC, Benedict AC, López F, Sheth M, Dzuris N, et al. Pyrethroid exposure  
561 alters internal and cuticle surface bacterial communities in *Anopheles albimanus*. *The ISME*  
562 *Journal*. 2019. doi: 10.1038/s41396-019-0445-5.
- 563 9. Huang W, Wang S, Jacobs-Lorena M. Use of Microbiota to Fight Mosquito-Borne  
564 Disease. 2020;11(196). doi: 10.3389/fgene.2020.00196.
- 565 10. Luis P, Vallon L, Tran F-H, Hugoni M, Tran-Van V, Mavingui P, et al. *Aedes albopictus*  
566 mosquitoes host a locally structured mycobiota with evidence of reduced fungal diversity in  
567 invasive populations. *Fungal Ecology*. 2019;39:257-66. doi:  
568 <https://doi.org/10.1016/j.funeco.2019.02.004>.
- 569 11. Thongsripong P, Chandler JA, Green AB, Kittayapong P, Wilcox BA, Kapan DD, et al.  
570 Mosquito vector-associated microbiota: Metabarcoding bacteria and eukaryotic symbionts  
571 across habitat types in Thailand endemic for dengue and other arthropod-borne diseases.  
572 *Ecology and evolution*. 2018;8(2):1352-68. Epub 2018/01/30. doi: 10.1002/ece3.3676. PubMed  
573 PMID: 29375803; PubMed Central PMCID: PMC5773340.

- 574 12. Shi C, Beller L, Deboutte W, Yinda KC, Delang L, Vega-Rúa A, et al. Stable distinct core  
575 eukaryotic viromes in different mosquito species from Guadeloupe, using single mosquito viral  
576 metagenomics. *Microbiome*. 2019;7(1):121. doi: 10.1186/s40168-019-0734-2.
- 577 13. Atoni E, Wang Y, Karungu S, Waruhiu C, Zohaib A, Obanda V, et al. Metagenomic  
578 Virome Analysis of Culex Mosquitoes from Kenya and China. *Viruses*. 2018;10(1). Epub  
579 2018/01/13. doi: 10.3390/v10010030. PubMed PMID: 29329230; PubMed Central PMCID:  
580 PMC5795443.
- 581 14. Crawford JE, Clarke DW, Criswell V, Desnoyer M, Cornel D, Deegan B, et al. Efficient  
582 production of male Wolbachia-infected Aedes aegypti mosquitoes enables large-scale  
583 suppression of wild populations. *Nature Biotechnology*. 2020;38(4):482-92. doi:  
584 10.1038/s41587-020-0471-x.
- 585 15. Flores HA, Taneja de Bruyne J, O'Donnell TB, Tuyet Nhu V, Thi Giang N, Thi Xuan  
586 Trang H, et al. Multiple Wolbachia strains provide comparative levels of protection against  
587 dengue virus infection in Aedes aegypti. *PLOS Pathogens*. 2020;16(4):e1008433. doi:  
588 10.1371/journal.ppat.1008433.
- 589 16. Capone A, Ricci I, Damiani C, Mosca M, Rossi P, Scuppa P, et al. Interactions between  
590 Asaia, Plasmodium and Anopheles: new insights into mosquito symbiosis and implications in  
591 Malaria Symbiotic Control. 2013;6(1):182. doi: 10.1186/1756-3305-6-182.
- 592 17. Wang S, Dos-Santos ALA, Huang W, Liu KC, Oshaghi MA, Wei G, et al. Driving  
593 mosquito refractoriness to *Plasmodium falciparum* with engineered symbiotic bacteria.  
594 2017;357(6358):1399-402. doi: 10.1126/science.aan5478 %J Science.
- 595 18. Villegas LM, Pimenta PFP. Metagenomics, paratransgenesis and the Anopheles  
596 microbiome: a portrait of the geographical distribution of the anopheline microbiota based on a  
597 meta-analysis of reported taxa. *Memórias do Instituto Oswaldo Cruz*. 2014;109:672-84.
- 598 19. Bascuñán P, Niño-García JP, Galeano-Castañeda Y, Serre D, Correa MMJM. Factors  
599 shaping the gut bacterial community assembly in two main Colombian malaria vectors.  
600 2018;6(1):148. doi: 10.1186/s40168-018-0528-y.
- 601 20. Galeano-Castañeda Y, Urrea-Aguirre P, Piedrahita S, Bascuñán P, Correa MM.  
602 Composition and structure of the culturable gut bacterial communities in Anopheles albimanus  
603 from Colombia. *PLOS ONE*. 2019;14(12):e0225833. doi: 10.1371/journal.pone.0225833.
- 604 21. Prussing C, Saavedra MP, Bickersmith SA, Alava F, Guzmán M, Manrique E, et al.  
605 Malaria vector species in Amazonian Peru co-occur in larval habitats but have distinct larval  
606 microbial communities. *PLOS Neglected Tropical Diseases*. 2019;13(5):e0007412. doi:  
607 10.1371/journal.pntd.0007412.
- 608 22. Hiwat H, Bretas G. Ecology of Anopheles darlingi Root with respect to vector importance:  
609 a review. *Parasites & Vectors*. 2011;4(1):177. doi: 10.1186/1756-3305-4-177.
- 610 23. Villarreal-Treviño C, Penilla-Navarro RP, Vázquez-Martínez MG, Moo-Llanes DA, Ríos-  
611 Delgado JC, Fernández-Salas I, et al. Larval habitat characterization of Anopheles darlingi from

- 612 its northernmost geographical distribution in Chiapas, Mexico. *Malaria Journal*. 2015;14(1):517.  
613 doi: 10.1186/s12936-015-1037-0.
- 614 24. Fillinger U, Sombroek H, Majambere S, van Loon E, Takken W, Lindsay SW. Identifying  
615 the most productive breeding sites for malaria mosquitoes in The Gambia. *Malaria Journal*.  
616 2009;8(1):62. doi: 10.1186/1475-2875-8-62.
- 617 25. Gimnig JE, Ombok M, Kamau L, Hawley WA. Characteristics of Larval Anopheline  
618 (Diptera: Culicidae) Habitats in Western Kenya. *Journal of Medical Entomology*. 2001;38(2):282-  
619 8. doi: 10.1603/0022-2585-38.2.282 %J *Journal of Medical Entomology*.
- 620 26. Grieco JP, Johnson S, Achee N, Masuoka P, Pope K, Rejmánková E, et al. Distribution  
621 of *Anopheles albimanus*, *Anopheles vestitipennis*, and *Anopheles crucians* associated with land  
622 use in northern Belize. 2006;43 *Journal of Medical Entomology*(3):614-22, 9.
- 623 27. Tchigossou G, Akoton R, Yessoufou A, Djegbe I, Zeukeng F, Atoyebi SM, et al. Water  
624 source most suitable for rearing a sensitive malaria vector, *Anopheles funestus* in the laboratory.  
625 Wellcome open research. 2017;2:109-. doi: 10.12688/wellcomeopenres.12942.2. PubMed  
626 PMID: 29387806.
- 627 28. Benedict MQ, Knols BGJ, Bossin HC, Howell PI, Mialhe E, Caceres C, et al. Colonisation  
628 and mass rearing: learning from others. *Malaria Journal*. 2009;8(2):S4. doi: 10.1186/1475-2875-  
629 8-S2-S4.
- 630 29. Organization WH. Anopheline species complexes in south-east Asia: WHO Regional  
631 Office for South-East Asia; 1998.
- 632 30. Rosa-Freitas MG, Lourenço-de-Oliveira R, Carvalho-Pinto CJd, Flores-Mendoza C,  
633 Silva-do-Nascimento TF. Anopheline Species Complexes in Brazil. Current Knowledge of Those  
634 Related to Malaria Transmission %J *Memórias do Instituto Oswaldo Cruz*. 1998;93:651-5.
- 635 31. Cohuet A, Simard F, Toto J-C, Kengne P, Coetzee M, Fontenille D. Species identification  
636 within the *Anopheles funestus* group of malaria vectors in Cameroon and evidence for a new  
637 species 2003;69(2):200-5. doi: <https://doi.org/10.4269/ajtmh.2003.69.200>.
- 638 32. Stevenson JC, Norris DE. Implicating Cryptic and Novel Anophelines as Malaria Vectors  
639 in Africa. *Insects*. 2016;8(1). Epub 2016/12/28. doi: 10.3390/insects8010001. PubMed PMID:  
640 28025486; PubMed Central PMCID: PMC5371929.
- 641 33. Omoke DN, Mugendi E, Ochomo E, Kipsum M, Otieno S, Esalimba E, et al., editors.  
642 Bacterial composition differs between permethrin-susceptible and -resistant *Anopheles gambiae*  
643 *sensu stricto* in a site with intense pyrethroid resistance in western Kenya. *American Journal of*  
644 *Tropical Medicine and Hygiene* 2019: American Society of Tropical Medicine and Hygiene 8000  
645 Westpark DR, STE 130, MCLEAN, VA 22101 USA.
- 646 34. Duguma D, Hall MW, Smartt CT, Debboun M, Neufeld JD. Microbiota variations in *Culex*  
647 *nigripalpus* disease vector mosquito of West Nile virus and Saint Louis Encephalitis from  
648 different geographic origins. *PeerJ*. 2019;6:e6168. doi: 10.7717/peerj.6168.

- 649 35. Muturi EJ, Lagos-Kutz D, Dunlap C, Ramirez JL, Rooney AP, Hartman GL, et al.  
650 Mosquito microbiota cluster by host sampling location. *Parasites & Vectors*. 2018;11(1):468. doi:  
651 10.1186/s13071-018-3036-9.
- 652 36. Coon KL, Vogel KJ, Brown MR, Strand MR. Mosquitoes rely on their gut microbiota for  
653 development. *Mol Ecol*. 2014;23(11):2727-39. Epub 2014/04/29. doi: 10.1111/mec.12771.  
654 PubMed PMID: 24766707; PubMed Central PMCID: PMC4083365.
- 655 37. Akorli J, Namaali PA, Ametsi GW, Egyirifa RK, Pels NAP. Generational conservation of  
656 composition and diversity of field-acquired midgut microbiota in *Anopheles gambiae* (sensu lato)  
657 during colonization in the laboratory. *Parasites & Vectors*. 2019;12(1):27. doi: 10.1186/s13071-  
658 019-3287-0.
- 659 38. Dickson LB, Ghazlane A, Volant S, Bouchier C, Ma L, Vega-Rúa A, et al. Diverse  
660 laboratory colonies of *Aedes aegypti* harbor the same adult midgut bacterial microbiome.  
661 *Parasites & Vectors*. 2018;11(1):207. doi: 10.1186/s13071-018-2780-1.
- 662 39. Duguma D, Hall MW, Rugman-Jones P, Stouthamer R, Terenius O, Neufeld JD, et al.  
663 Developmental succession of the microbiome of *Culex* mosquitoes. 2015;15(1):140. doi:  
664 10.1186/s12866-015-0475-8.
- 665 40. Gimonneau G, Tchioffo MT, Abate L, Boissière A, Awono-Ambéné PH, Nsango SE, et al.  
666 Composition of *Anopheles coluzzii* and *Anopheles gambiae* microbiota from larval to adult  
667 stages. *Infection, Genetics and Evolution*. 2014;28:715-24. doi:  
668 <https://doi.org/10.1016/j.meegid.2014.09.029>.
- 669 41. Saab SA, Dohna Hz, Nilsson LKJ, Onorati P, Nakhleh J, Terenius O, et al. The  
670 environment and species affect gut bacteria composition in laboratory co-cultured *Anopheles*  
671 *gambiae* and *Aedes albopictus* mosquitoes. *Scientific Reports*. 2020;10(1):3352. doi:  
672 10.1038/s41598-020-60075-6.
- 673 42. Damiani C, Ricci I, Crotti E, Rossi P, Rizzi A, Scuppa P, et al. Mosquito-Bacteria  
674 Symbiosis: The Case of *Anopheles gambiae* and *Asaia*. *Microbial Ecology*. 2010;60(3):644-54.  
675 doi: 10.1007/s00248-010-9704-8.
- 676 43. Rossi P, Ricci I, Cappelli A, Damiani C, Ulissi U, Mancini MV, et al. Mutual exclusion of  
677 *Asaia* and *Wolbachia* in the reproductive organs of mosquito vectors. *Parasites & Vectors*.  
678 2015;8(1):278. doi: 10.1186/s13071-015-0888-0.
- 679 44. Benedict MQ. *Transgenic insects: techniques and applications*: CABI; 2014.
- 680 45. Crotti E, Rizzi A, Chouaia B, Ricci I, Favia G, Alma A, et al. Acetic Acid Bacteria, Newly  
681 Emerging Symbionts of Insects. 2010;76(21):6963-70. doi: 10.1128/AEM.01336-10 %J Applied  
682 and Environmental Microbiology.
- 683 46. Moll RM, Romoser WS, Modrzakowski MC, Moncayo AC, Lerdthusnee K. Meconial  
684 peritrophic membranes and the fate of midgut bacteria during mosquito (Diptera: Culicidae)  
685 metamorphosis. *J Med Entomol*. 2001;38(1):29-32. Epub 2001/03/28. doi: 10.1603/0022-2585-  
686 38.1.29. PubMed PMID: 11268687.



- 687 47. Rodgers FH, Gendrin M, Wyer CAS, Christophides GK. Microbiota-induced peritrophic  
688 matrix regulates midgut homeostasis and prevents systemic infection of malaria vector  
689 mosquitoes. *PLOS Pathogens*. 2017;13(5):e1006391. doi: 10.1371/journal.ppat.1006391.
- 690 48. Song X, Wang M, Dong L, Zhu H, Wang J. PGRP-LD mediates *A. stephensi* vector  
691 competency by regulating homeostasis of microbiota-induced peritrophic matrix synthesis. *PLoS*  
692 *pathogens*. 2018;14(2):e1006899-e. doi: 10.1371/journal.ppat.1006899. PubMed PMID:  
693 29489896.
- 694 49. Gao L, Song X, Wang J. Gut microbiota is essential in PGRP-LA regulated immune  
695 protection against *Plasmodium berghei* infection. *Parasites & vectors*. 2020;13(1):3-. doi:  
696 10.1186/s13071-019-3876-y. PubMed PMID: 31907025.
- 697 50. Minard G, Tran F-H, Tran Van V, Fournier C, Potier P, Roiz D, et al. Shared larval  
698 rearing environment, sex, female size and genetic diversity shape *Ae. albopictus* bacterial  
699 microbiota. *PLOS ONE*. 2018;13(4):e0194521. doi: 10.1371/journal.pone.0194521.
- 700 51. Short SM, Mongodin EF, MacLeod HJ, Talyuli OAC, Dimopoulos G. Amino acid  
701 metabolic signaling influences *Aedes aegypti* midgut microbiome variability. *PLoS Negl Trop Dis*.  
702 2017;11(7):e0005677. Epub 2017/07/29. doi: 10.1371/journal.pntd.0005677. PubMed PMID:  
703 28753661; PubMed Central PMCID: PMC5549995.
- 704 52. Boissière A, Tchioffo MT, Bachar D, Abate L, Marie A, Nsango SE, et al. Midgut  
705 microbiota of the malaria mosquito vector *Anopheles gambiae* and interactions with *Plasmodium*  
706 *falciparum* infection. *PLoS pathogens*. 2012;8(5):e1002742-e. Epub 2012/05/31. doi:  
707 10.1371/journal.ppat.1002742. PubMed PMID: 22693451.
- 708 53. Hegde S, Khanipov K, Albayrak L, Golovko G, Pimenova M, Saldaña MA, et al.  
709 Microbiome Interaction Networks and Community Structure From Laboratory-Reared and Field-  
710 Collected *Aedes aegypti*, *Aedes albopictus*, and *Culex quinquefasciatus* Mosquito Vectors.  
711 *Frontiers in microbiology*. 2018;9:2160-. doi: 10.3389/fmicb.2018.02160. PubMed PMID:  
712 30250462.
- 713 54. Villegas LM, Pimenta PF. Metagenomics, paratransgenesis and the *Anopheles*  
714 microbiome: a portrait of the geographical distribution of the anopheline microbiota based on a  
715 meta-analysis of reported taxa. *Mem Inst Oswaldo Cruz*. 2014;109(5):672-84. Epub 2014/09/04.  
716 doi: 10.1590/0074-0276140194. PubMed PMID: 25185007; PubMed Central PMCID:  
717 PMC4156461.
- 718 55. Dinparast Djadid N, Jazayeri H, Raz A, Favia G, Ricci I, Zakeri S. Identification of the  
719 Midgut Microbiota of *An. stephensi* and *An. maculipennis* for Their Application as a  
720 Paratransgenic Tool against Malaria. *PLOS ONE*. 2011;6(12):e28484. doi:  
721 10.1371/journal.pone.0028484.
- 722 56. Favia G, Ricci I, Damiani C, Raddadi N, Crotti E, Marzorati M, et al. Bacteria of the genus  
723 *Asaia* stably associate with *Anopheles stephensi*, an Asian malarial mosquito vector.  
724 2007;104(21):9047-51. doi: 10.1073/pnas.0610451104 %J Proceedings of the National  
725 Academy of Sciences.



- 726 57. Wilkerson RC, Strickman D, Litwak TR. Illustrated key to the female anopheline  
727 mosquitoes of Central America and Mexico. Journal of the American Mosquito Control  
728 Association. 1990;6(1):7-34. Epub 1990/03/01. PubMed PMID: 2324726.
- 729 58. Choochote W, Saeung A. Systematic techniques for the recognition of *Anopheles*  
730 species complexes. In: Manguin S, editor. *Anopheles* mosquitoes: IntechOpen; 2013.
- 731 59. Beebe NW, Saul A. Discrimination of all members of the *Anopheles punctulatus* complex  
732 by polymerase chain reaction--restriction fragment length polymorphism analysis. Am J Trop  
733 Med Hyg. 1995;53(5):478-81. Epub 1995/11/01. PubMed PMID: 7485705.
- 734 60. MR4. Amplification of the second internal transcribed spacer region (ITS2) in  
735 *Anophelines*. Methods in *Anopheles* research: BEI Resources; 2015.
- 736 61. Bolyen E, Rideout JR, Dillon MR, Bokulich NA, Abnet CC, Al-Ghalith GA, et al.  
737 Reproducible, interactive, scalable and extensible microbiome data science using QIIME 2.  
738 Nature Biotechnology. 2019. doi: 10.1038/s41587-019-0209-9.
- 739 62. Callahan BJ, McMurdie PJ, Rosen MJ, Han AW, Johnson AJA, Holmes SP. DADA2:  
740 High-resolution sample inference from Illumina amplicon data. Nature Methods. 2016;13:581.  
741 doi: 10.1038/nmeth.3869
- 742 <https://www.nature.com/articles/nmeth.3869#supplementary-information>.
- 743 63. Crawley MJ. The R book: John Wiley & Sons; 2012.
- 744 64. McMurdie PJ, Holmes S. phyloseq: An R Package for Reproducible Interactive Analysis  
745 and Graphics of Microbiome Census Data. PLOS ONE. 2013;8(4):e61217. doi:  
746 10.1371/journal.pone.0061217.
- 747 65. Zhang H, editor The optimality of Naive Bayes. FLAIRS Conference; 2004.
- 748 66. Bokulich NA, Kaehler BD, Rideout JR, Dillon M, Bolyen E, Knight R, et al. Optimizing  
749 taxonomic classification of marker-gene amplicon sequences with QIIME 2's q2-feature-classifier  
750 plugin. Microbiome. 2018;6(1):90. doi: 10.1186/s40168-018-0470-z.
- 751 67. Quast C, Pruesse E, Yilmaz P, Gerken J, Schweer T, Yarza P, et al. The SILVA  
752 ribosomal RNA gene database project: improved data processing and web-based tools. Nucleic  
753 Acids Research. 2013;41(D1):D590-D6. doi: 10.1093/nar/gks1219.
- 754 68. Mandal S, Van Treuren W, White RA, Eggesbo M, Knight R, Peddada SD. Analysis of  
755 composition of microbiomes: a novel method for studying microbial composition. Microb Ecol  
756 Health Dis. 2015;26:27663. Epub 2015/06/02. doi: 10.3402/mehd.v26.27663. PubMed PMID:  
757 26028277; PubMed Central PMCID: PMC4450248.
- 758 69. team I. Inkscape: <http://www.inkscape.org/> 2004.
- 759

760 **Supporting Information**

761 **Suppl. 1.** Shannon alpha diversity plots

762 **Suppl. 2.** Frequency and relative abundance of microbial taxa detected in internal and cuticle

763 surface microbiota of F<sub>1</sub> laboratory colonized *An. albimanus* larvae and adults

764 **Suppl. 3.** Summary statistics of sequencing reads and amplicon sequence variants (ASVs) used

765 for downstream analysis

766 **Suppl. 4.** Rarefaction depth and plots of sequencing reads

767 **Suppl 5.** Results of downstream analysis including low frequency (potentially extraneous) reads

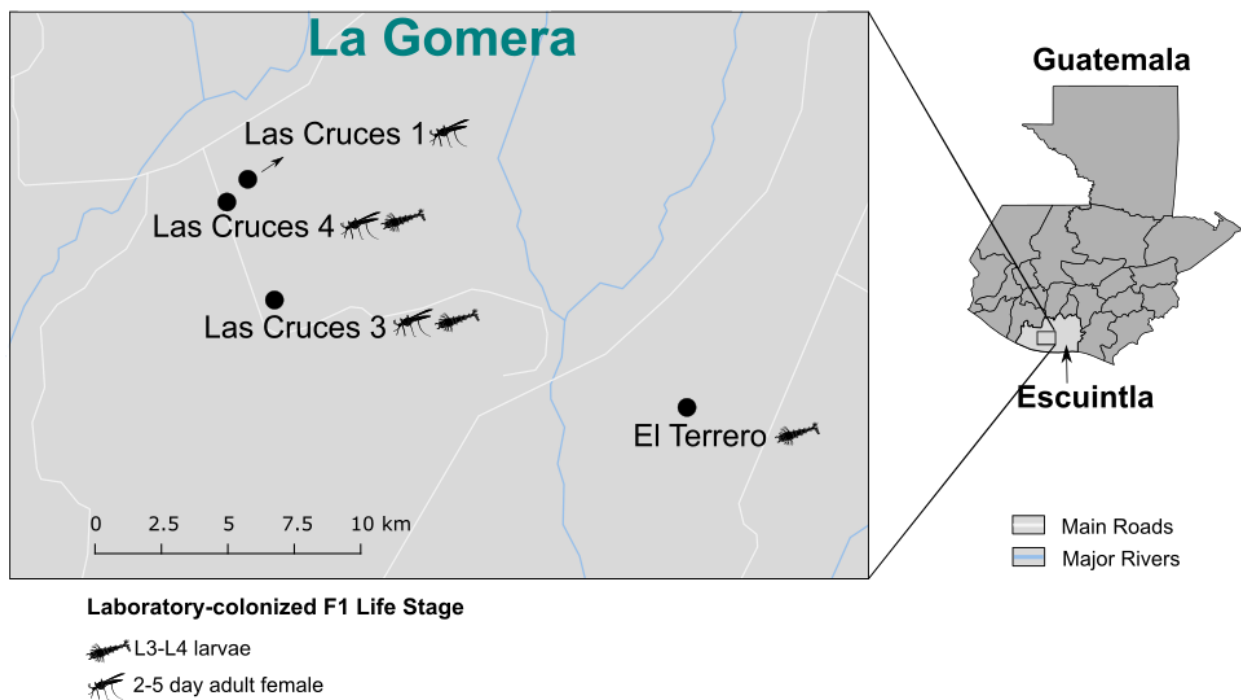

**Figure 1:** Map showing the geographical origins of F<sub>1</sub> *Anopheles albimanus*. F<sub>1</sub> laboratory-colonized mosquitoes were derived from gravid and/or blood fed females collected from each location. Mosquito icons show the geographical origin of the F<sub>1</sub> life stages studied.

## LARVAE

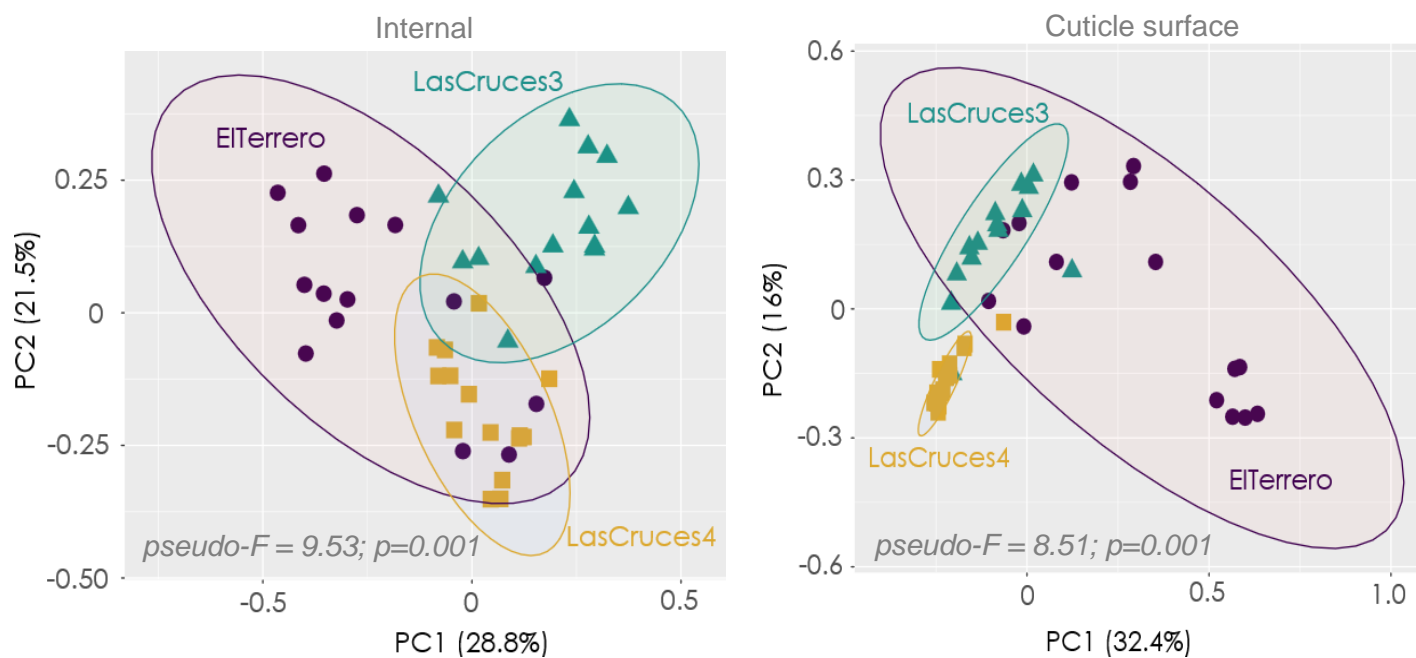

## ADULTS

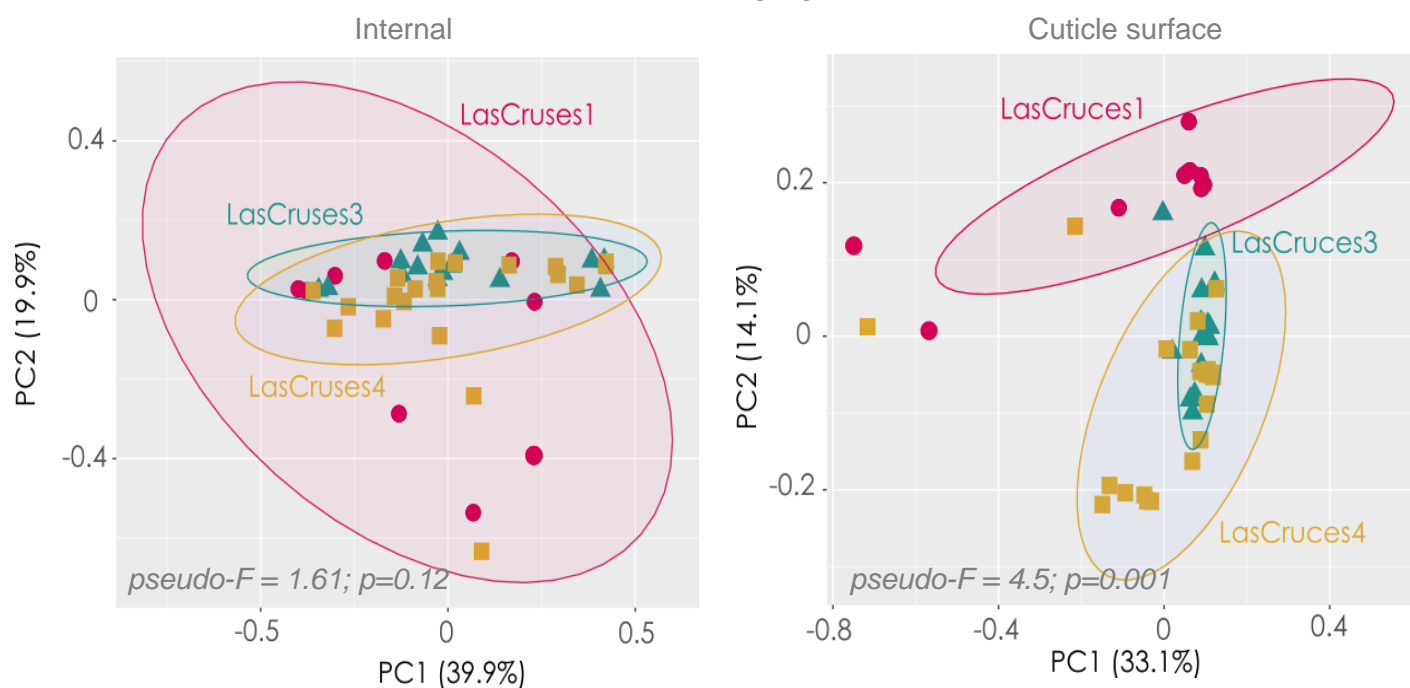

**Figure 2. Principal coordinate analysis (PCoA) ordinations of internal and cuticle surface microbiota from F<sub>1</sub> laboratory-colonized *An. albimanus*.** The PCoA plots are based on Bray-Curtis distances between the microbiota of mosquitoes with differing collection sites. Each point on the plot represents the microbial composition of a pool of three individuals, and mosquito pools are color-coded by their origin. For larvae, the first two principal component (PC) axes captured 50% (internal) and 48% (cuticle surface) of the variance in the data, with both internal

and cuticle surface microbiota clustering distinctly by collection site. For adults, the first two PC axes captured 59% (internal) and 47% (cuticle surface) of the variance in the data, with cuticle surface but not internal microbiota clustering distinctly by collection site. PERMANOVA statistics are presented at the bottom of each plot.

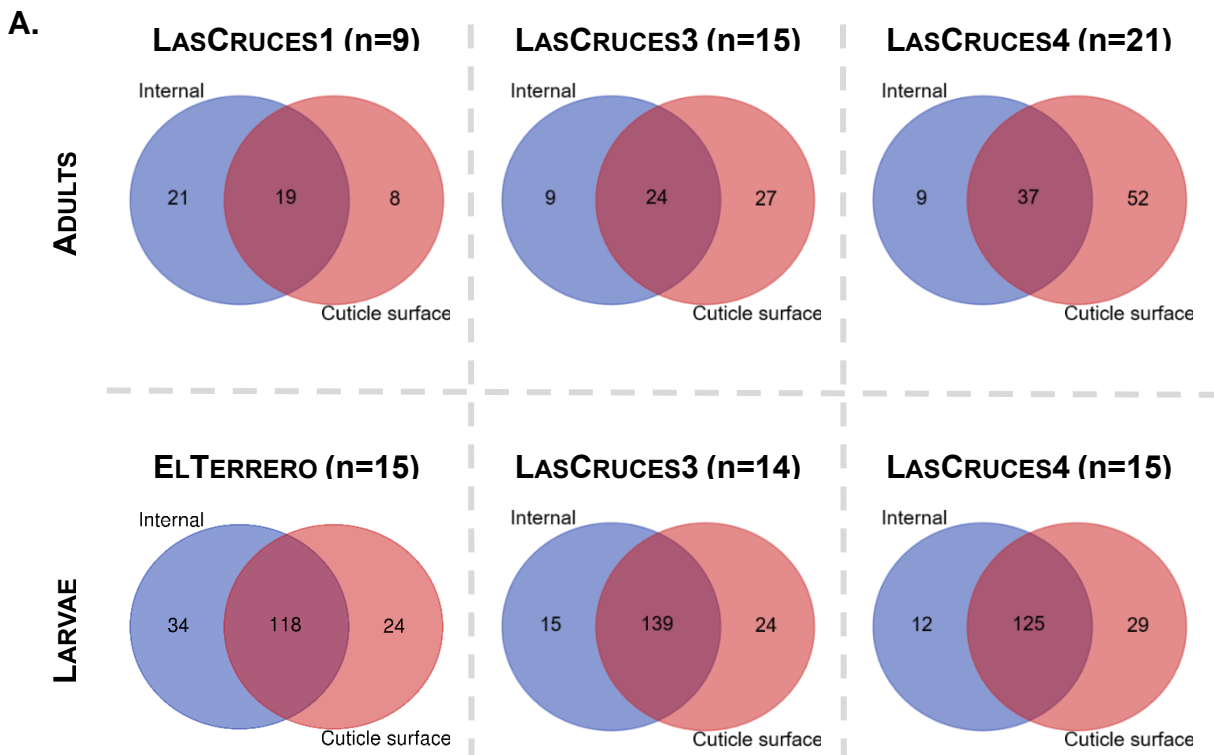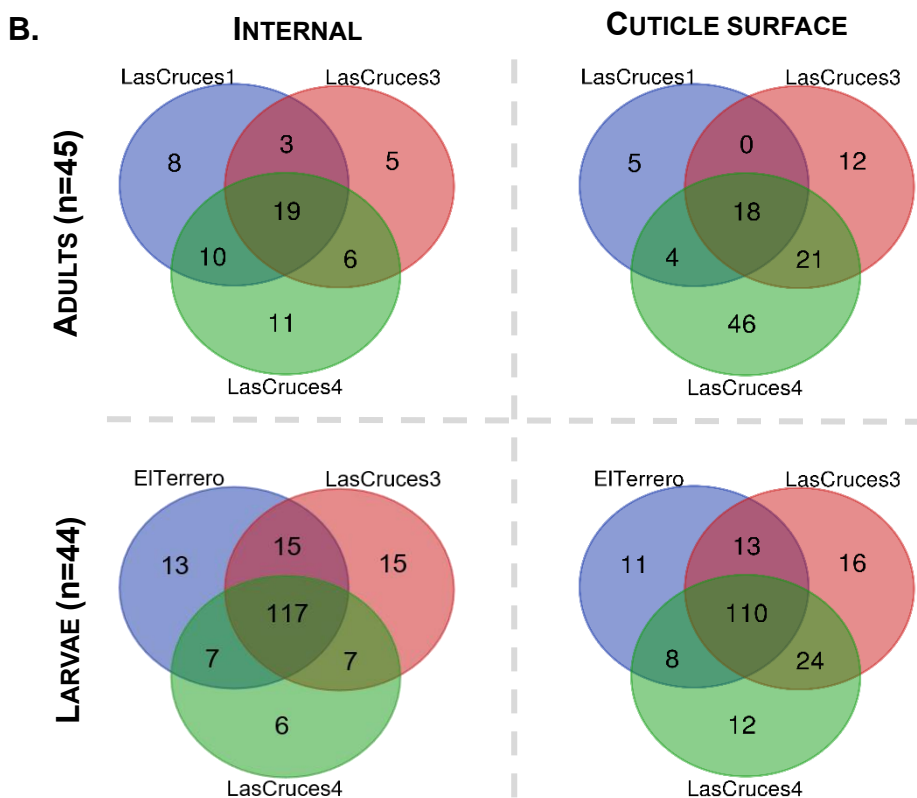

**Figure 3. Number of unique and shared microbial taxa between microbial niches (A); number of unique and shared microbial taxa between collection sites (B).** The number of taxa shown in the Venn diagram represent bacterial taxa except in the cuticle surface microbiota of adults from Las Cruces 4, where two archaeal taxa were present. n = pools of mosquito samples analyzed per location or microbial.

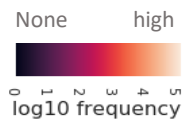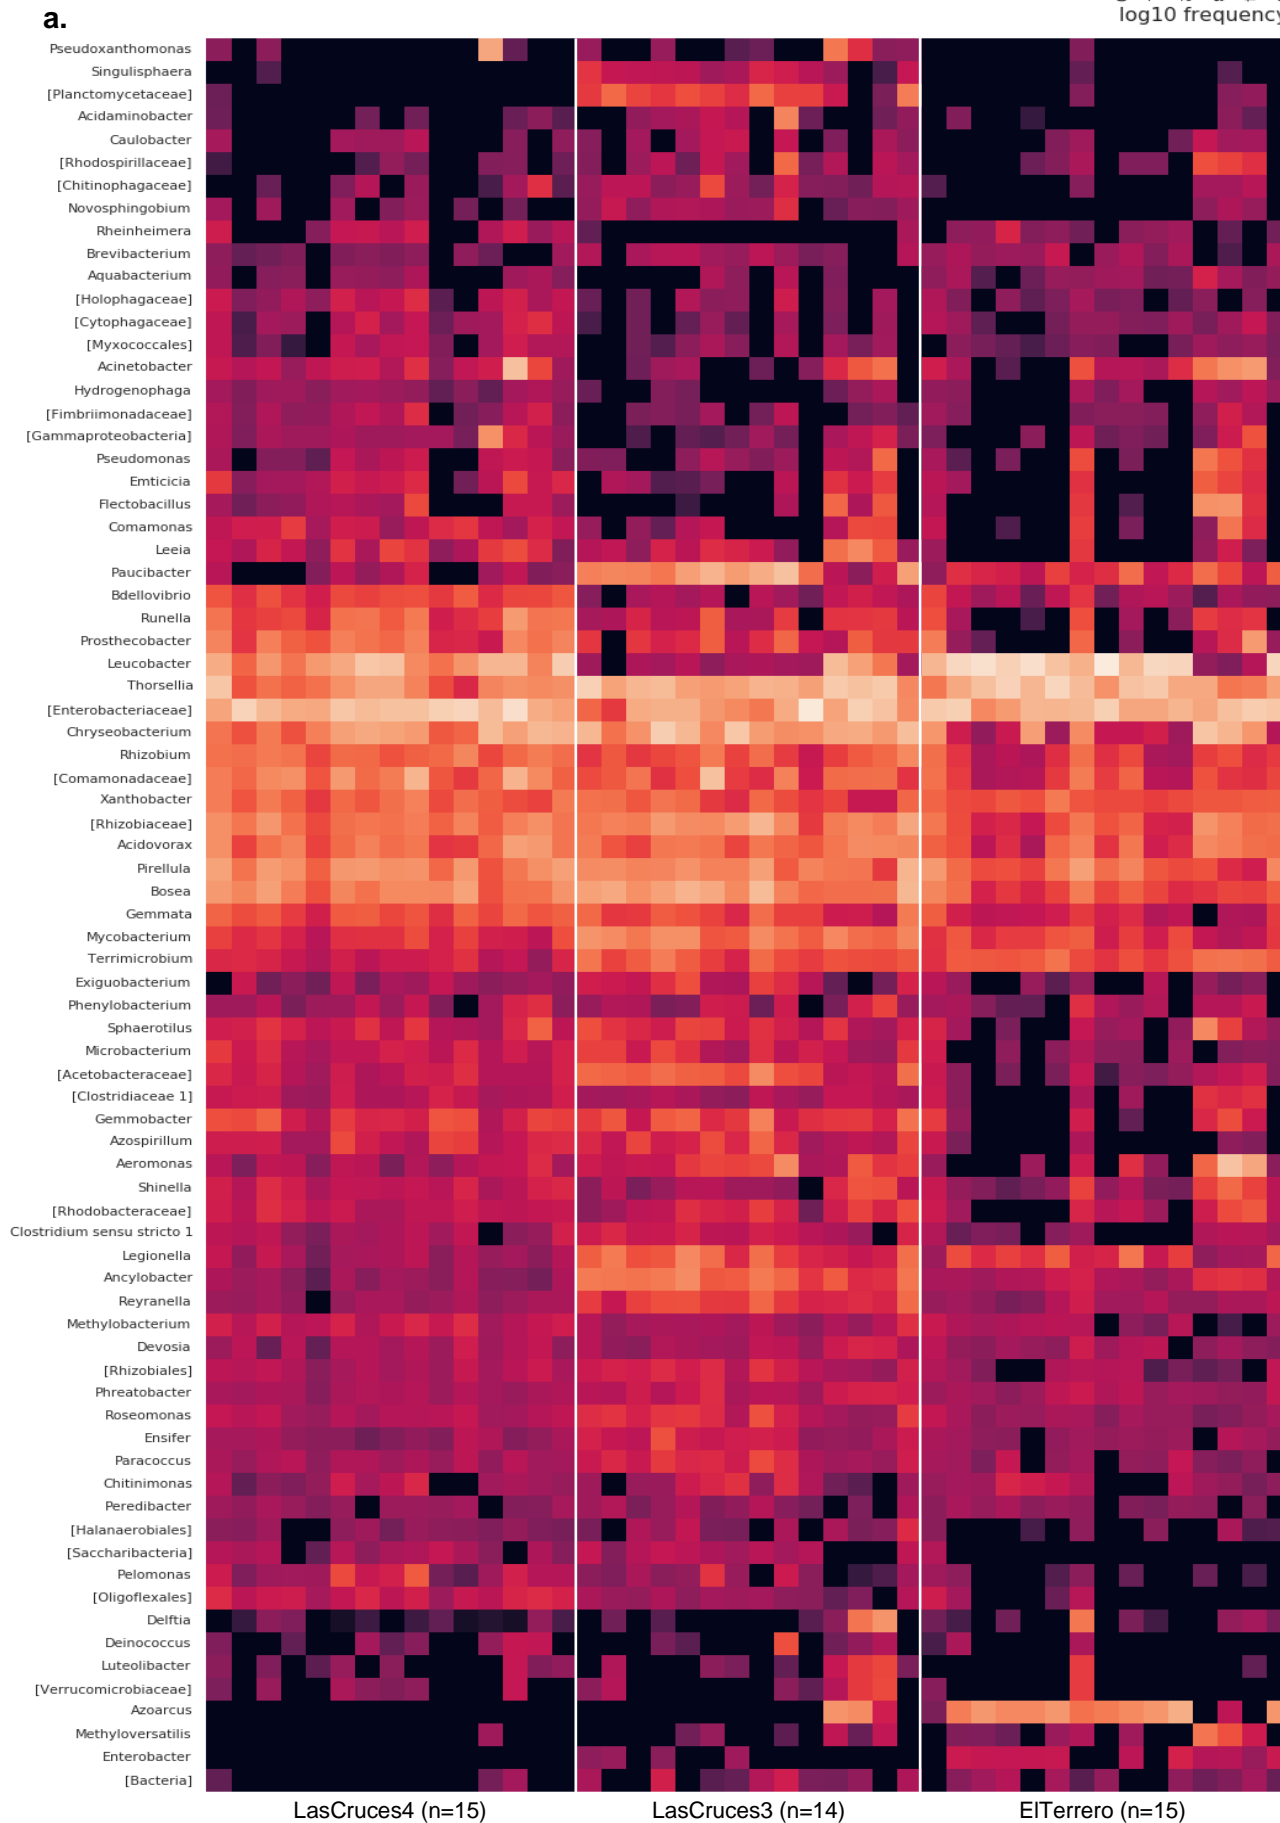



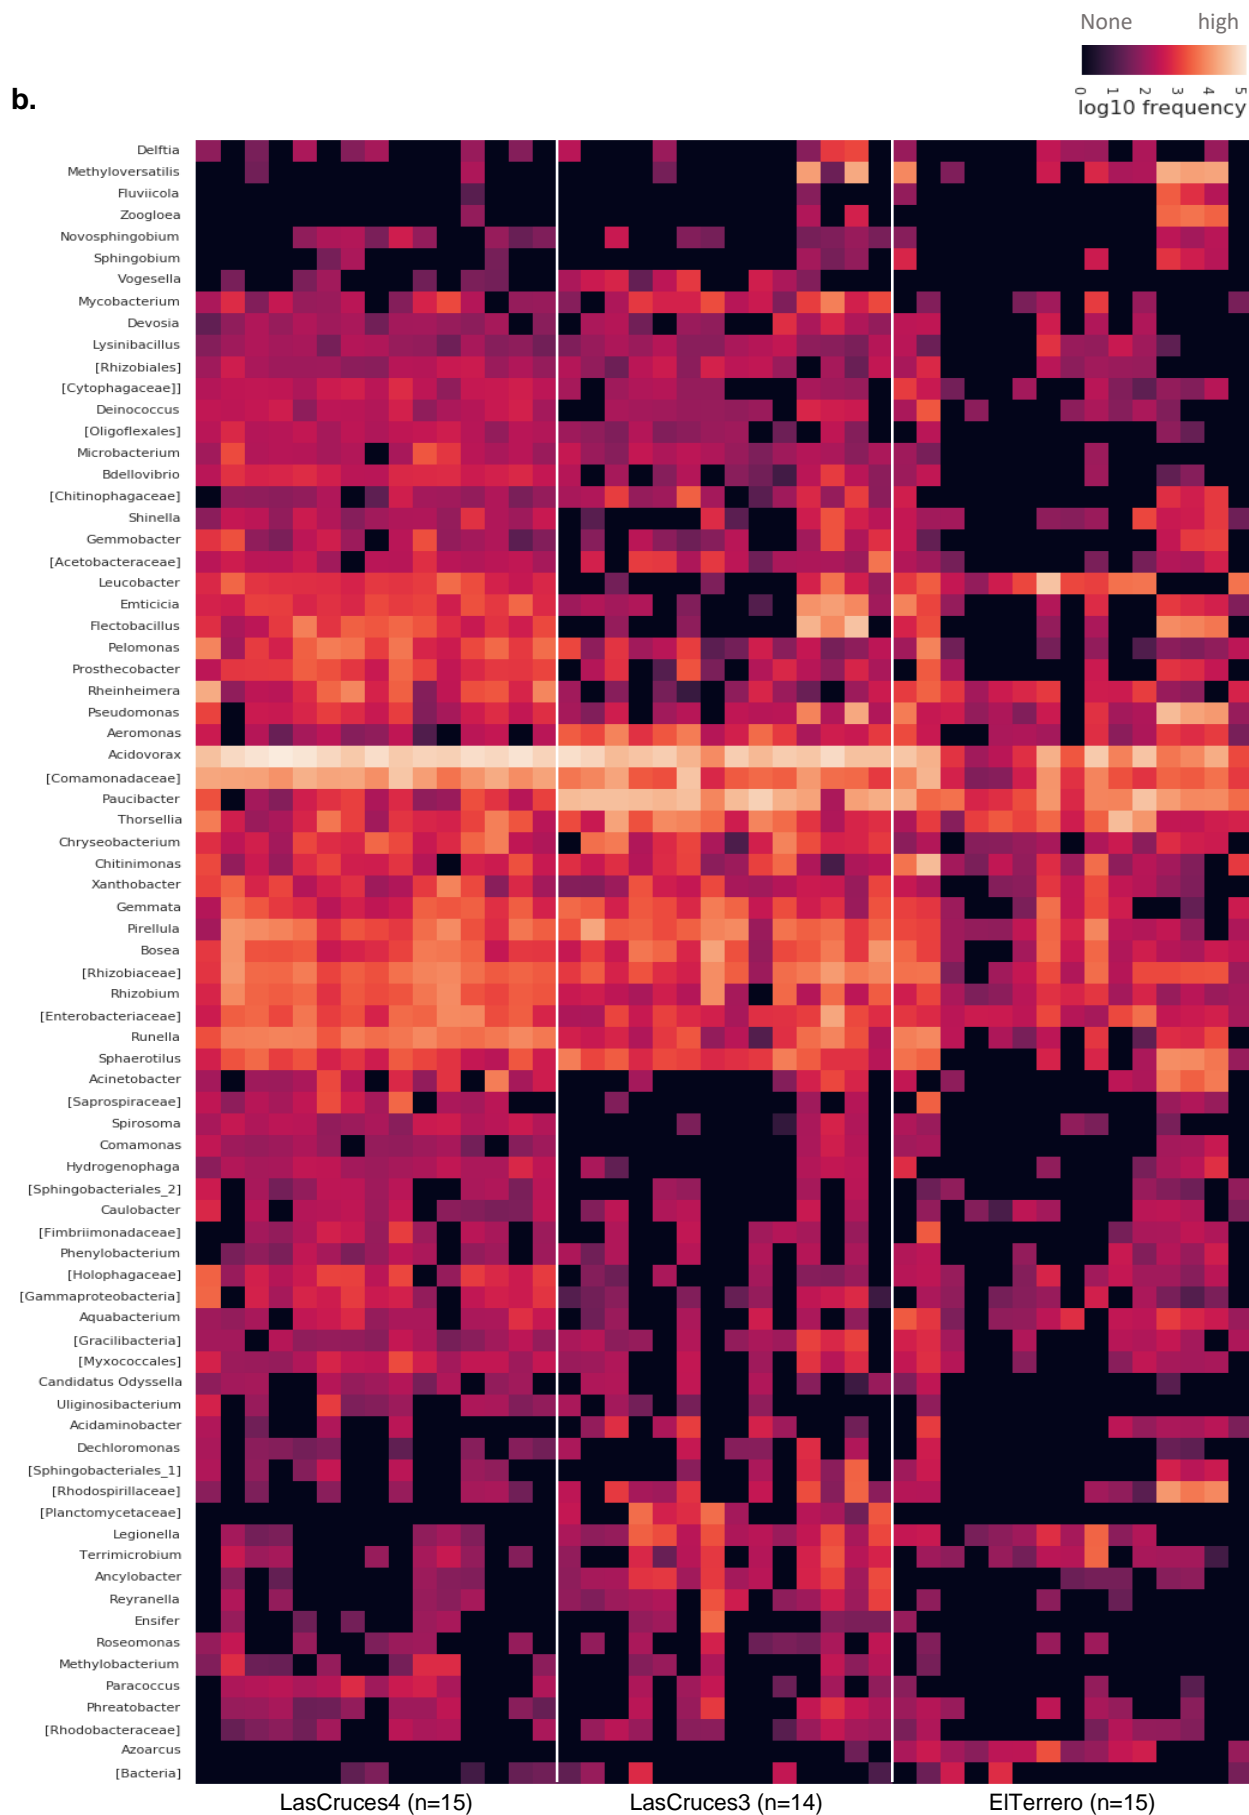

**Figure 4. Frequency of ASVs from the internal (a) and cuticle surface (b) microbiota of laboratory-colonized *An. albimanus* F<sub>1</sub> larvae originating from different collection sites.**

ASVs were annotated to the genus level or the lowest possible taxonomic level (in square brackets) and are clustered by the average nearest-neighbors chain algorithm. Only taxonomically annotated ASVs with frequencies  $\geq 2000$  are presented.

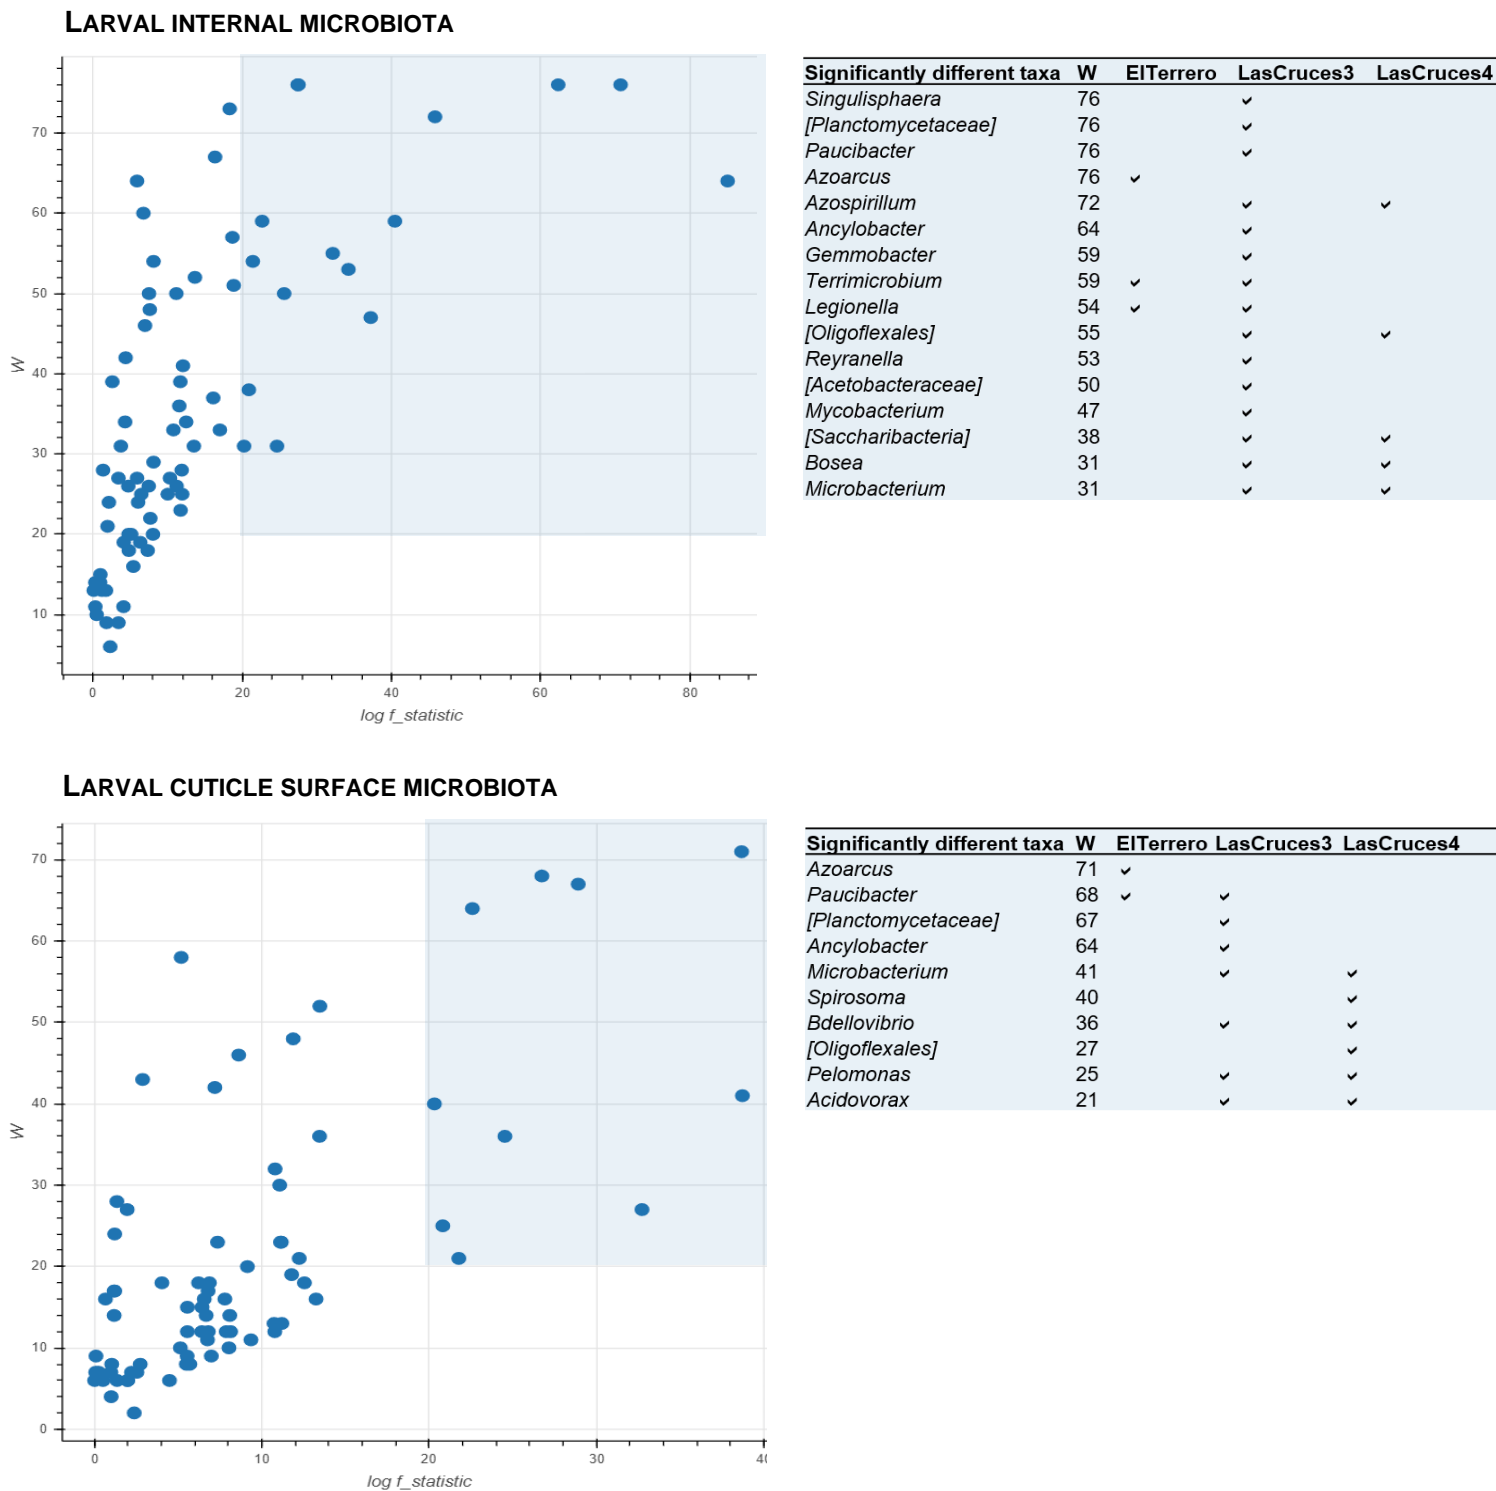

**Figure 5. Volcano plots of differentially abundant bacterial taxa in F<sub>1</sub> laboratory colonized *An. albimanus* larvae originating from three different collection sites.** The plots show results of analysis of composition of microbiomes (ANCOM) tests for differentially abundant microbial taxa between collection site, with an effect size set to log F<sub>20</sub>, and a cut-off of

differential abundance set to  $W \geq 20$  (i.e., a taxon was differentially abundant across collection sites if the ratio of its abundance to those of at least 20 other taxa (25% of all included taxa) differed significantly across sites). Differentially abundant taxa are highlighted (blue shaded area) and the taxa names and locations in which they were most abundant are presented in the adjoining tables.

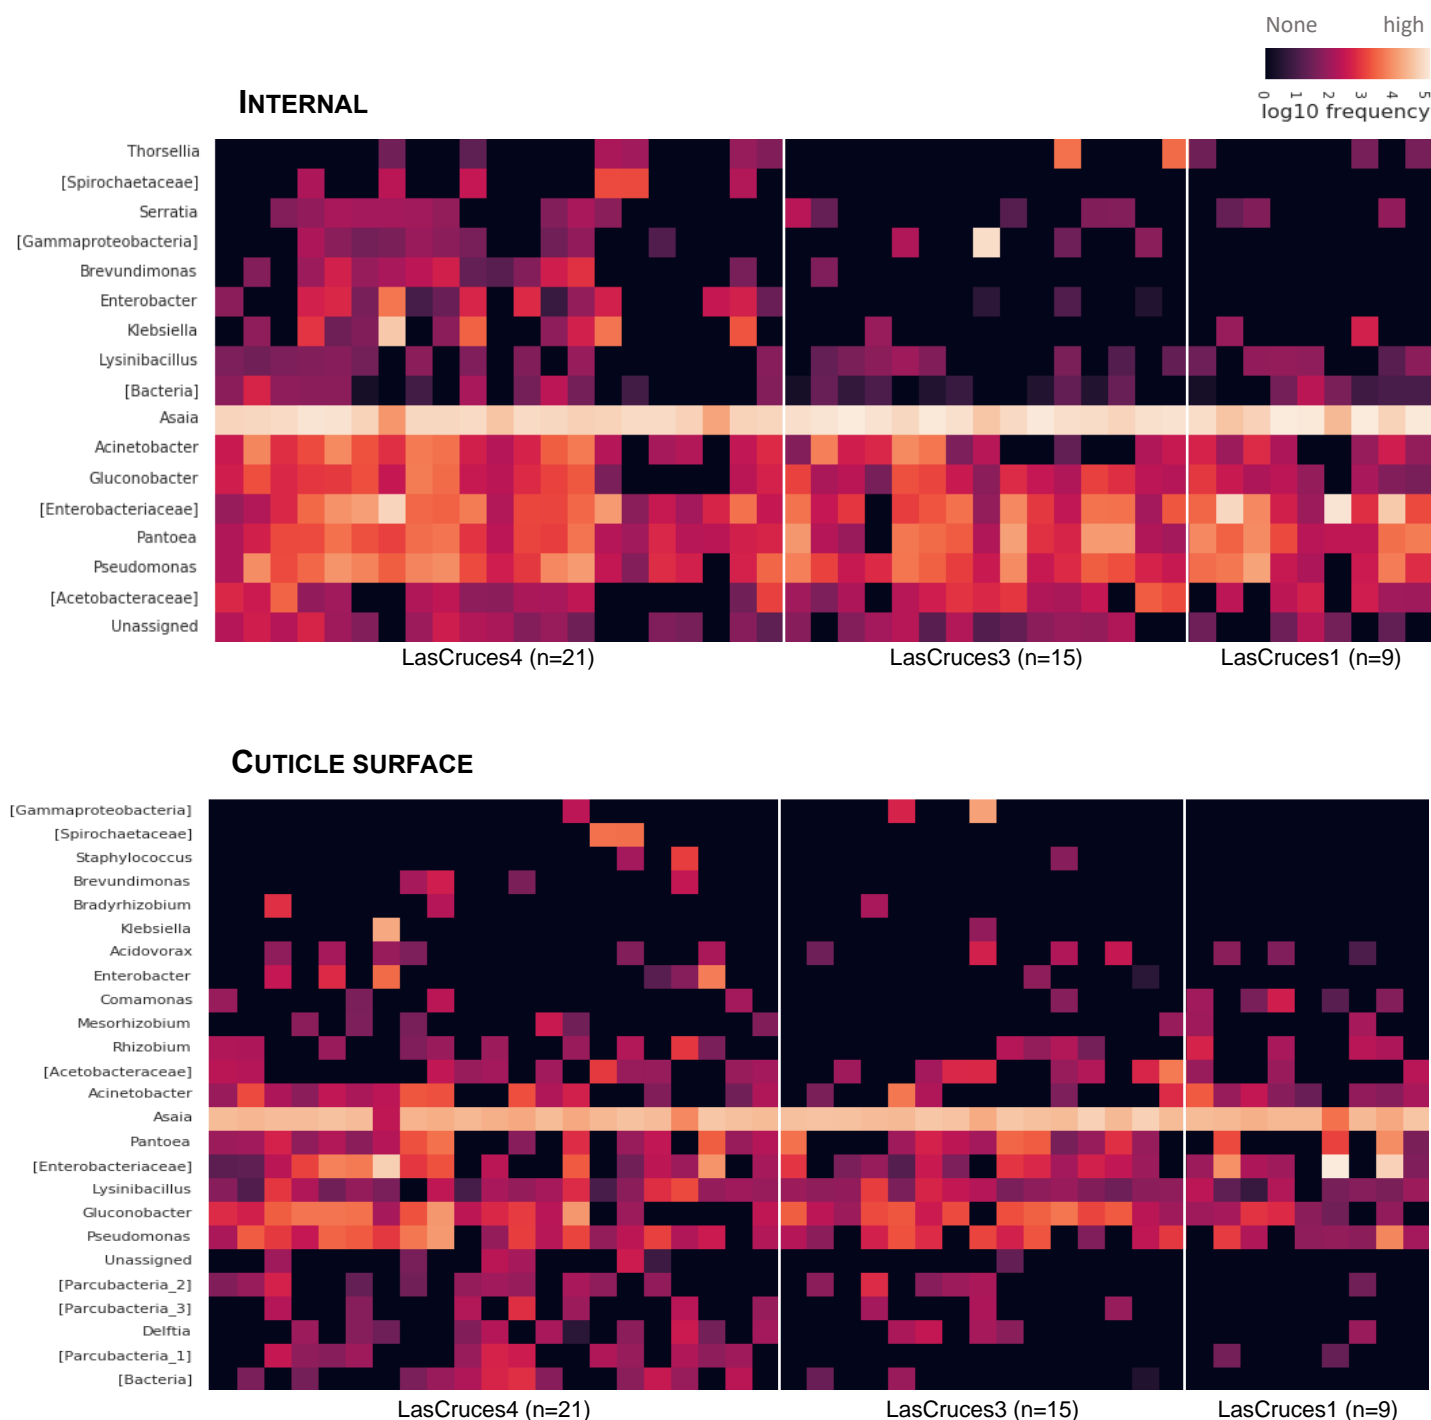

**Figure 6. Frequency of ASVs from the internal and cuticle surface microbiota of laboratory-colonized F<sub>1</sub> adult *An. albimanus* originating from different locations.** ASVs were annotated to the genus level or the lowest possible taxonomic level (in square brackets) and are clustered by the average nearest-neighbors chain algorithm. Only taxonomically annotated ASVs with frequencies  $\geq 1000$  are presented.

**Table 1.** Descriptive statistics of laboratory colonized F<sub>1</sub> *An. albimanus* processed, per life stage and collection site.

| Collection site | Number of mosquitoes (number of pools) |          |
|-----------------|----------------------------------------|----------|
|                 | L3-L4 larvae                           | Adult ♀s |
| El Terrero      | 45 (15)                                | -        |
| Las Cruces 1    | -                                      | 27 (9)   |
| Las Cruces 3    | 42 (14)                                | 45 (15)  |
| Las Cruces 4    | 45 (15)                                | 63 (21)  |

**Table 2. Pairwise alpha and beta diversity comparisons of laboratory colonized F<sub>1</sub> *An. albimanus* microbiota from different collection sites. a.** Pairwise beta (Bray-Curtis) diversity comparison showed significant differences in larval internal and cuticle surface microbiota between collection sites. In contrast, only adult cuticle surface but not internal microbiota were significantly different across collection sites. **b.** Pairwise alpha (Shannon) diversity comparison showed significant differences in larval internal but not cuticle surface microbiota between collection sites (two of the three pairs). In contrast, there was no significant difference in adult internal or cuticle surface microbiota between collection sites. Pairwise alpha and beta diversity comparisons were conducted using Kruskal-Wallis and PERMANOVA (999 permutations) tests respectively, with Benjamini-Hochberg FDR correction (q-value). Significance was determined at  $q < 0.05$ . n = No. of pools processed, and each pool comprised three individual mosquitoes.

**a.**

|        | Group 1                       | Group 2           | Internal     |              |              | Cuticle surface |              |              |
|--------|-------------------------------|-------------------|--------------|--------------|--------------|-----------------|--------------|--------------|
|        |                               |                   | pseudo-F     | p-value      | q-value      | pseudo-F        | p-value      | q-value      |
| Adults | LasCruces1 (n=9)              | LasCruces3 (n=15) | 2.21         | 0.088        | 0.161        | <b>5.80</b>     | <b>0.001</b> | <b>0.003</b> |
|        | LasCruces1 (n=9)              | LasCruces4 (n=21) | 1.92         | 0.107        | 0.161        | <b>4.97</b>     | <b>0.004</b> | <b>0.005</b> |
|        | LasCruces3 (n=15)             | LasCruces4 (n=21) | 0.85         | 0.443        | 0.443        | <b>3.07</b>     | <b>0.005</b> | <b>0.005</b> |
| Larvae | EITerrero <sup>a</sup> (n=15) | LasCruces3 (n=14) | <b>9.81</b>  | <b>0.001</b> | <b>0.001</b> | <b>4.48</b>     | <b>0.001</b> | <b>0.001</b> |
|        | EITerrero <sup>a</sup> (n=15) | LasCruces4 (n=15) | <b>7.98</b>  | <b>0.001</b> | <b>0.001</b> | <b>11.43</b>    | <b>0.001</b> | <b>0.001</b> |
|        | LasCruces3 (n=14)             | LasCruces4 (n=15) | <b>10.88</b> | <b>0.001</b> | <b>0.001</b> | <b>11.37</b>    | <b>0.001</b> | <b>0.001</b> |

<sup>a</sup>Two pools were excluded from the analysis of cuticle surface microbiota following rarefaction

**b.**

|        | Group 1           | Group 2           | Internal    |             |             | Cuticle surface |         |         |
|--------|-------------------|-------------------|-------------|-------------|-------------|-----------------|---------|---------|
|        |                   |                   | H           | p-value     | q-value     | H               | p-value | q-value |
| Adults | LasCruces1 (n=9)  | LasCruces3 (n=15) | 0.00        | 0.98        | 0.98        | 1.09            | 0.30    | 0.41    |
|        | LasCruces1 (n=9)  | LasCruces4 (n=21) | 0.49        | 0.48        | 0.72        | 1.23            | 0.27    | 0.41    |
|        | LasCruces3 (n=15) | LasCruces4 (n=21) | 1.77        | 0.18        | 0.55        | 0.67            | 0.41    | 0.41    |
| Larvae | EITerrero (n=15)  | LasCruces3 (n=14) | <b>6.63</b> | <b>0.01</b> | <b>0.02</b> | 4.45            | 0.03    | 0.10    |
|        | EITerrero (n=15)  | LasCruces4 (n=15) | <b>6.94</b> | <b>0.01</b> | <b>0.02</b> | 1.87            | 0.17    | 0.26    |
|        | LasCruces3 (n=14) | LasCruces4 (n=15) | 0.49        | 0.48        | 0.48        | 1.10            | 0.29    | 0.29    |
